# Supplementary material for: Colonization of the human gut by bovine bacteria present in Parmesan cheese
Source: PubMed Central journal article supplement (PMC6426854; doi:10.1038/s41467-019-09303-w), 2019-03-20
Supplement: 41467_2019_9303_MOESM1_ESM.pdf [file 41467_2019_9303_MOESM1_ESM.pdf]

## Supplementary Information

### Colonization of the human gut by bovine bacteria present in Parmesan cheese

Key words: bifidobacteria, metagenomics, diet, cheese, food microorganisms, RNAseq

Christian Milani<sup>1</sup>, Sabrina Duranti<sup>1</sup>, Stefania Napoli<sup>2</sup>, Giulia Alessandri<sup>3</sup>, Leonardo Mancabelli<sup>2</sup>,  
Rosaria Anzalone<sup>2</sup>, Giulia Longhi<sup>2</sup>, Alice Viappiani<sup>2</sup>, Marta Mangifesta<sup>1,2</sup>, Gabriele Andrea Lugli<sup>1</sup>,  
Sergio Bernasconi<sup>4</sup>, Maria Cristina Ossiprandi<sup>5</sup>, Douwe van Sinderen<sup>5,6,7</sup>, Marco Ventura<sup>1,4,\*</sup> and  
Francesca Turrone<sup>1,4,\*</sup>

Laboratory of Probiogenomics, Department of Chemistry, Life Sciences and Environmental Sustainability, University of Parma, Italy<sup>1</sup>; GenProbio srl, Parma, Italy<sup>2</sup>; Department of Veterinary Science, University of Parma, Italy<sup>3</sup>; Microbiome Research Hub, University of Parma, Parma, Italy<sup>4</sup>; Department of Veterinary Medical Science, University of Parma, Parma, Italy<sup>5</sup>; APC Microbiome Ireland<sup>6</sup> and School of Microbiology<sup>7</sup>, University College Cork, Cork, Ireland.

\*These authors contributed equally to this work.

Corresponding author: Prof. Marco Ventura, Department of Chemistry, Life Sciences and Environmental Sustainability, University of Parma, Parco Area delle Scienze 11a, 43124 Parma, Italy. Phone: +39-0521-905666. Fax: +39-521-905604. E-mail: [marco.ventura@unipr.it](mailto:marco.ventura@unipr.it)

Francesca Turrone Department of Life Sciences, University of Parma, Parco Area delle Scienze 11a, 43124 Parma, Italy. Phone: +39-0521-905666. Fax: +39-521-905604. E-mail:

[francesca.turrone@unipr.it](mailto:francesca.turrone@unipr.it)

**Supplementary Table 1:** Detailed information regarding samples included in this study.

| <b>Samples name</b> | <b>Husbandry</b> | <b>Samples type</b> | <b>Breed</b> | <b>Feed</b> | <b>Housing</b> |
|---------------------|------------------|---------------------|--------------|-------------|----------------|
| P1_CF_1             | Parma 1          | faecal              | Friesian cow | Hay         | Tied up        |
| P1_CF_2             | Parma 1          | faecal              | Friesian cow | Hay         | Tied up        |
| P1_CF_3             | Parma 1          | faecal              | Friesian cow | Hay         | Tied up        |
| P1_CF_4             | Parma 1          | faecal              | Friesian cow | Hay         | Tied up        |
| P1_CF_5             | Parma 1          | faecal              | Friesian cow | Hay         | Tied up        |
| P1_CF_6             | Parma 1          | faecal              | Friesian cow | Hay         | Tied up        |
| P1_CF_7             | Parma 1          | faecal              | Friesian cow | Hay         | Tied up        |
| P1_CF_8             | Parma 1          | faecal              | Friesian cow | Hay         | Tied up        |
| P1_CF_9             | Parma 1          | faecal              | Friesian cow | Hay         | Tied up        |
| P1_CF_10            | Parma 1          | faecal              | Friesian cow | Hay         | Tied up        |
| P1_MIL_1            | Parma 1          | Milk                | Friesian cow | Hay         | Tied up        |
| P1_MIL_2            | Parma 1          | Milk                | Friesian cow | Hay         | Tied up        |
| P1_MIL_3            | Parma 1          | Milk                | Friesian cow | Hay         | Tied up        |
| P1_MIL_4            | Parma 1          | Milk                | Friesian cow | Hay         | Tied up        |
| P1_MIL_5            | Parma 1          | Milk                | Friesian cow | Hay         | Tied up        |
| P1_MIL_6            | Parma 1          | Milk                | Friesian cow | Hay         | Tied up        |
| P1_MIL_7            | Parma 1          | Milk                | Friesian cow | Hay         | Tied up        |
| P1_MIL_8            | Parma 1          | Milk                | Friesian cow | Hay         | Tied up        |
| P1_MIL_9            | Parma 1          | Milk                | Friesian cow | Hay         | Tied up        |
| P1_MIL_10           | Parma 1          | Milk                | Friesian cow | Hay         | Tied up        |
| P1_LIT_1            | Parma 1          | Litter              |              |             |                |
| P1_LIT_2            | Parma 1          | Litter              |              |             |                |
| P1_LIT_3            | Parma 1          | Litter              |              |             |                |
| P1_LIT_4            | Parma 1          | Litter              |              |             |                |
| P1_LIT_5            | Parma 1          | Litter              |              |             |                |
| P1_LIT_6            | Parma 1          | Litter              |              |             |                |
| P1_LIT_7            | Parma 1          | Litter              |              |             |                |
| P1_LIT_8            | Parma 1          | Litter              |              |             |                |
| P1_LIT_9            | Parma 1          | Litter              |              |             |                |
| P1_LIT_10           | Parma 1          | Litter              |              |             |                |
| P1_PC_1             | Parma 1          | Parmesan<br>Cheese  | Friesian cow | Hay         | Tied up        |
| P1_PC_2             | Parma 1          | Parmesan<br>Cheese  | Friesian cow | Hay         | Tied up        |
| P1_PC_3             | Parma 1          | Parmesan<br>Cheese  | Friesian cow | Hay         | Tied up        |
| P2_CF_1             | Parma 2          | faecal              | Friesian cow | Hay         | Unbound        |
| P2_CF_2             | Parma 2          | faecal              | Friesian cow | Hay         | Unbound        |
| P2_CF_3             | Parma 2          | faecal              | Friesian cow | Hay         | Unbound        |
| P2_CF_4             | Parma 2          | faecal              | Friesian cow | Hay         | Unbound        |
| P2_CF_5             | Parma 2          | faecal              | Friesian cow | Hay         | Unbound        |
| P2_CF_6             | Parma 2          | faecal              | Friesian cow | Hay         | Unbound        |
| P2_CF_7             | Parma 2          | faecal              | Friesian cow | Hay         | Unbound        |
| P2_CF_8             | Parma 2          | faecal              | Friesian cow | Hay         | Unbound        |

|           |         |                    |              |     |         |
|-----------|---------|--------------------|--------------|-----|---------|
| P2_CF_9   | Parma 2 | faecal             | Friesian cow | Hay | Unbound |
| P2_CF_10  | Parma 2 | faecal             | Friesian cow | Hay | Unbound |
| P2_MIL_1  | Parma 2 | Milk               | Friesian cow | Hay | Unbound |
| P2_MIL_2  | Parma 2 | Milk               | Friesian cow | Hay | Unbound |
| P2_MIL_3  | Parma 2 | Milk               | Friesian cow | Hay | Unbound |
| P2_MIL_4  | Parma 2 | Milk               | Friesian cow | Hay | Unbound |
| P2_MIL_5  | Parma 2 | Milk               | Friesian cow | Hay | Unbound |
| P2_MIL_6  | Parma 2 | Milk               | Friesian cow | Hay | Unbound |
| P2_MIL_7  | Parma 2 | Milk               | Friesian cow | Hay | Unbound |
| P2_MIL_8  | Parma 2 | Milk               | Friesian cow | Hay | Unbound |
| P2_MIL_9  | Parma 2 | Milk               | Friesian cow | Hay | Unbound |
| P2_MIL_10 | Parma 2 | Milk               | Friesian cow | Hay | Unbound |
| P2_LIT_1  | Parma 2 | Litter             |              |     |         |
| P2_LIT_2  | Parma 2 | Litter             |              |     |         |
| P2_LIT_3  | Parma 2 | Litter             |              |     |         |
| P2_LIT_4  | Parma 2 | Litter             |              |     |         |
| P2_LIT_5  | Parma 2 | Litter             |              |     |         |
| P2_LIT_6  | Parma 2 | Litter             |              |     |         |
| P2_LIT_7  | Parma 2 | Litter             |              |     |         |
| P2_LIT_8  | Parma 2 | Litter             |              |     |         |
| P2_LIT_9  | Parma 2 | Litter             |              |     |         |
| P2_LIT_10 | Parma 2 | Litter             |              |     |         |
| P2_PC_1   | Parma 2 | Parmesan<br>Cheese | Friesian cow | Hay | Unbound |
| P2_PC_2   | Parma 2 | Parmesan<br>Cheese | Friesian cow | Hay | Unbound |
| P2_PC_3   | Parma 2 | Parmesan<br>Cheese | Friesian cow | Hay | Unbound |
| P3_CF_1   | Parma 3 | faecal             | Friesian cow | Hay | Unbound |
| P3_CF_2   | Parma 3 | faecal             | Friesian cow | Hay | Unbound |
| P3_CF_3   | Parma 3 | faecal             | Friesian cow | Hay | Unbound |
| P3_CF_4   | Parma 3 | faecal             | Friesian cow | Hay | Unbound |
| P3_CF_5   | Parma 3 | faecal             | Friesian cow | Hay | Unbound |
| P3_CF_6   | Parma 3 | faecal             | Friesian cow | Hay | Unbound |
| P3_CF_7   | Parma 3 | faecal             | Friesian cow | Hay | Unbound |
| P3_CF_8   | Parma 3 | faecal             | Friesian cow | Hay | Unbound |
| P3_CF_9   | Parma 3 | faecal             | Friesian cow | Hay | Unbound |
| P3_CF_10  | Parma 3 | faecal             | Friesian cow | Hay | Unbound |
| P3_MIL_1  | Parma 3 | Milk               | Friesian cow | Hay | Unbound |
| P3_MIL_2  | Parma 3 | Milk               | Friesian cow | Hay | Unbound |
| P3_MIL_3  | Parma 3 | Milk               | Friesian cow | Hay | Unbound |
| P3_MIL_4  | Parma 3 | Milk               | Friesian cow | Hay | Unbound |
| P3_MIL_5  | Parma 3 | Milk               | Friesian cow | Hay | Unbound |
| P3_MIL_6  | Parma 3 | Milk               | Friesian cow | Hay | Unbound |
| P3_MIL_7  | Parma 3 | Milk               | Friesian cow | Hay | Unbound |
| P3_MIL_8  | Parma 3 | Milk               | Friesian cow | Hay | Unbound |
| P3_MIL_9  | Parma 3 | Milk               | Friesian cow | Hay | Unbound |

|                   |                 |                    |              |     |         |
|-------------------|-----------------|--------------------|--------------|-----|---------|
| <b>P3_MIL_10</b>  | Parma 3         | Milk               | Friesian cow | Hay | Unbound |
| <b>P3_LIT_1</b>   | Parma 3         | Litter             |              |     |         |
| <b>P3_LIT_2</b>   | Parma 3         | Litter             |              |     |         |
| <b>P3_LIT_3</b>   | Parma 3         | Litter             |              |     |         |
| <b>P3_LIT_4</b>   | Parma 3         | Litter             |              |     |         |
| <b>P3_LIT_5</b>   | Parma 3         | Litter             |              |     |         |
| <b>P3_LIT_6</b>   | Parma 3         | Litter             |              |     |         |
| <b>P3_LIT_7</b>   | Parma 3         | Litter             |              |     |         |
| <b>P3_LIT_8</b>   | Parma 3         | Litter             |              |     |         |
| <b>P3_LIT_9</b>   | Parma 3         | Litter             |              |     |         |
| <b>P3_LIT_10</b>  | Parma 3         | Litter             |              |     |         |
| <b>P3_PC_1</b>    | Parma 3         | Parmesan<br>Cheese | Friesian cow | Hay | Unbound |
| <b>P3_PC_2</b>    | Parma 3         | Parmesan<br>Cheese | Friesian cow | Hay | Unbound |
| <b>P3_PC_3</b>    | Parma 3         | Parmesan<br>Cheese | Friesian cow | Hay | Unbound |
| <b>RE1_CF_1</b>   | Reggio Emilia 1 | faecal             | Friesian cow | Hay | Tied up |
| <b>RE1_CF_2</b>   | Reggio Emilia 1 | faecal             | Friesian cow | Hay | Tied up |
| <b>RE1_CF_3</b>   | Reggio Emilia 1 | faecal             | Friesian cow | Hay | Tied up |
| <b>RE1_CF_4</b>   | Reggio Emilia 1 | faecal             | Friesian cow | Hay | Tied up |
| <b>RE1_CF_5</b>   | Reggio Emilia 1 | faecal             | Friesian cow | Hay | Tied up |
| <b>RE1_CF_6</b>   | Reggio Emilia 1 | faecal             | Friesian cow | Hay | Tied up |
| <b>RE1_CF_7</b>   | Reggio Emilia 1 | faecal             | Friesian cow | Hay | Tied up |
| <b>RE1_CF_8</b>   | Reggio Emilia 1 | faecal             | Friesian cow | Hay | Tied up |
| <b>RE1_CF_9</b>   | Reggio Emilia 1 | faecal             | Friesian cow | Hay | Tied up |
| <b>RE1_CF_10</b>  | Reggio Emilia 1 | faecal             | Friesian cow | Hay | Tied up |
| <b>RE1_MIL_1</b>  | Reggio Emilia 1 | Milk               | Friesian cow | Hay | Tied up |
| <b>RE1_MIL_2</b>  | Reggio Emilia 1 | Milk               | Friesian cow | Hay | Tied up |
| <b>RE1_MIL_3</b>  | Reggio Emilia 1 | Milk               | Friesian cow | Hay | Tied up |
| <b>RE1_MIL_4</b>  | Reggio Emilia 1 | Milk               | Friesian cow | Hay | Tied up |
| <b>RE1_MIL_5</b>  | Reggio Emilia 1 | Milk               | Friesian cow | Hay | Tied up |
| <b>RE1_MIL_6</b>  | Reggio Emilia 1 | Milk               | Friesian cow | Hay | Tied up |
| <b>RE1_MIL_7</b>  | Reggio Emilia 1 | Milk               | Friesian cow | Hay | Tied up |
| <b>RE1_MIL_8</b>  | Reggio Emilia 1 | Milk               | Friesian cow | Hay | Tied up |
| <b>RE1_MIL_9</b>  | Reggio Emilia 1 | Milk               | Friesian cow | Hay | Tied up |
| <b>RE1_MIL_10</b> | Reggio Emilia 1 | Milk               | Friesian cow | Hay | Tied up |
| <b>RE1_LIT_1</b>  | Reggio Emilia 1 | Litter             |              |     |         |
| <b>RE1_LIT_2</b>  | Reggio Emilia 1 | Litter             |              |     |         |
| <b>RE1_LIT_3</b>  | Reggio Emilia 1 | Litter             |              |     |         |
| <b>RE1_LIT_4</b>  | Reggio Emilia 1 | Litter             |              |     |         |
| <b>RE1_LIT_5</b>  | Reggio Emilia 1 | Litter             |              |     |         |
| <b>RE1_LIT_6</b>  | Reggio Emilia 1 | Litter             |              |     |         |
| <b>RE1_LIT_7</b>  | Reggio Emilia 1 | Litter             |              |     |         |
| <b>RE1_LIT_8</b>  | Reggio Emilia 1 | Litter             |              |     |         |
| <b>RE1_LIT_9</b>  | Reggio Emilia 1 | Litter             |              |     |         |
| <b>RE1_LIT_10</b> | Reggio Emilia 1 | Litter             |              |     |         |

|            |                 |                    |              |     |         |
|------------|-----------------|--------------------|--------------|-----|---------|
| RE1_PC_1   | Reggio Emilia 1 | Parmesan<br>Cheese | Friesian cow | Hay | Tied up |
| RE1_PC_2   | Reggio Emilia 1 | Parmesan<br>Cheese | Friesian cow | Hay | Tied up |
| RE1_PC_3   | Reggio Emilia 1 | Parmesan<br>Cheese | Friesian cow | Hay | Tied up |
| RE2_CF_1   | Reggio Emilia 2 | faecal             | Red cow      | Hay | Unbound |
| RE2_CF_2   | Reggio Emilia 2 | faecal             | Red cow      | Hay | Unbound |
| RE2_CF_3   | Reggio Emilia 2 | faecal             | Red cow      | Hay | Unbound |
| RE2_CF_4   | Reggio Emilia 2 | faecal             | Red cow      | Hay | Unbound |
| RE2_CF_5   | Reggio Emilia 2 | faecal             | Red cow      | Hay | Unbound |
| RE2_CF_6   | Reggio Emilia 2 | faecal             | Red cow      | Hay | Unbound |
| RE2_CF_7   | Reggio Emilia 2 | faecal             | Red cow      | Hay | Unbound |
| RE2_CF_8   | Reggio Emilia 2 | faecal             | Red cow      | Hay | Unbound |
| RE2_CF_9   | Reggio Emilia 2 | faecal             | Red cow      | Hay | Unbound |
| RE2_CF_10  | Reggio Emilia 2 | faecal             | Red cow      | Hay | Unbound |
| RE2_MIL_1  | Reggio Emilia 2 | Milk               | Red cow      | Hay | Unbound |
| RE2_MIL_2  | Reggio Emilia 2 | Milk               | Red cow      | Hay | Unbound |
| RE2_MIL_3  | Reggio Emilia 2 | Milk               | Red cow      | Hay | Unbound |
| RE2_MIL_4  | Reggio Emilia 2 | Milk               | Red cow      | Hay | Unbound |
| RE2_MIL_5  | Reggio Emilia 2 | Milk               | Red cow      | Hay | Unbound |
| RE2_MIL_6  | Reggio Emilia 2 | Milk               | Red cow      | Hay | Unbound |
| RE2_MIL_7  | Reggio Emilia 2 | Milk               | Red cow      | Hay | Unbound |
| RE2_MIL_8  | Reggio Emilia 2 | Milk               | Red cow      | Hay | Unbound |
| RE2_MIL_9  | Reggio Emilia 2 | Milk               | Red cow      | Hay | Unbound |
| RE2_MIL_10 | Reggio Emilia 2 | Milk               | Red cow      | Hay | Unbound |
| RE2_LIT_1  | Reggio Emilia 2 | Litter             |              |     |         |
| RE2_LIT_2  | Reggio Emilia 2 | Litter             |              |     |         |
| RE2_LIT_3  | Reggio Emilia 2 | Litter             |              |     |         |
| RE2_LIT_4  | Reggio Emilia 2 | Litter             |              |     |         |
| RE2_LIT_5  | Reggio Emilia 2 | Litter             |              |     |         |
| RE2_LIT_6  | Reggio Emilia 2 | Litter             |              |     |         |
| RE2_LIT_7  | Reggio Emilia 2 | Litter             |              |     |         |
| RE2_LIT_8  | Reggio Emilia 2 | Litter             |              |     |         |
| RE2_LIT_9  | Reggio Emilia 2 | Litter             |              |     |         |
| RE2_LIT_10 | Reggio Emilia 2 | Litter             |              |     |         |
| RE2_PC_1   | Reggio Emilia 2 | Parmesan<br>Cheese | Red cow      | Hay | Unbound |
| RE2_PC_2   | Reggio Emilia 2 | Parmesan<br>Cheese | Red cow      | Hay | Unbound |
| RE2_PC_3   | Reggio Emilia 2 | Parmesan<br>Cheese | Red cow      | Hay | Unbound |

**Supplementary Table 2: Quality-filtering table of 16S rRNA gene profiling datasets.**

| Sample    | Production site | Matrix          | Number of sequenced reads | Number of reads with mean quality > 20 | Denoised reads | Chimeric reads | Final Read Number |
|-----------|-----------------|-----------------|---------------------------|----------------------------------------|----------------|----------------|-------------------|
| P1_CF_1   | Parma 1         | faecal          | 78774                     | 72829                                  | 72829          | 2830           | 69999             |
| P1_CF_2   | Parma 1         | faecal          | 77401                     | 73155                                  | 73155          | 2156           | 70999             |
| P1_CF_3   | Parma 1         | faecal          | 77380                     | 71315                                  | 71315          | 2290           | 69025             |
| P1_CF_4   | Parma 1         | faecal          | 81958                     | 76644                                  | 76644          | 3868           | 72776             |
| P1_CF_5   | Parma 1         | faecal          | 96902                     | 88205                                  | 88205          | 3331           | 84874             |
| P1_CF_6   | Parma 1         | faecal          | 84537                     | 78688                                  | 78688          | 2770           | 75918             |
| P1_CF_7   | Parma 1         | faecal          | 80798                     | 73951                                  | 73951          | 2604           | 71347             |
| P1_CF_8   | Parma 1         | faecal          | 82687                     | 78621                                  | 78621          | 4278           | 74343             |
| P1_CF_9   | Parma 1         | faecal          | 84688                     | 77222                                  | 77222          | 2659           | 74563             |
| P1_CF_10  | Parma 1         | faecal          | 88338                     | 83495                                  | 83495          | 2888           | 80607             |
| P1_MIL_1  | Parma 1         | Milk            | 79253                     | 79310                                  | 79310          | 3059           | 76251             |
| P1_MIL_2  | Parma 1         | Milk            | 63253                     | 75104                                  | 75104          | 4817           | 70287             |
| P1_MIL_3  | Parma 1         | Milk            | 89009                     | 77711                                  | 77711          | 6645           | 71066             |
| P1_MIL_4  | Parma 1         | Milk            | 89527                     | 68858                                  | 68858          | 1283           | 67575             |
| P1_MIL_5  | Parma 1         | Milk            | 103646                    | 94589                                  | 94589          | 9275           | 85314             |
| P1_MIL_6  | Parma 1         | Milk            | 95993                     | 78349                                  | 78349          | 915            | 77434             |
| P1_MIL_7  | Parma 1         | Milk            | 105813                    | 94612                                  | 94612          | 5884           | 88728             |
| P1_MIL_8  | Parma 1         | Milk            | 92113                     | 85267                                  | 85267          | 3795           | 81472             |
| P1_MIL_9  | Parma 1         | Milk            | 94718                     | 84605                                  | 84605          | 5253           | 79352             |
| P1_MIL_10 | Parma 1         | Milk            | 94701                     | 86113                                  | 86113          | 7251           | 78862             |
| P1_LIT_1  | Parma 1         | Litter          | 72603                     | 66073                                  | 66073          | 2802           | 63271             |
| P1_LIT_2  | Parma 1         | Litter          | 92108                     | 84233                                  | 84233          | 3795           | 80438             |
| P1_LIT_3  | Parma 1         | Litter          | 103800                    | 92607                                  | 92607          | 3360           | 89247             |
| P1_LIT_4  | Parma 1         | Litter          | 81767                     | 75032                                  | 75032          | 6748           | 68284             |
| P1_LIT_5  | Parma 1         | Litter          | 109203                    | 97833                                  | 97833          | 2512           | 95321             |
| P1_LIT_6  | Parma 1         | Litter          | 114476                    | 103180                                 | 103180         | 4031           | 99149             |
| P1_LIT_7  | Parma 1         | Litter          | 102756                    | 92364                                  | 92364          | 2560           | 89804             |
| P1_LIT_8  | Parma 1         | Litter          | 84344                     | 78783                                  | 78783          | 6111           | 72672             |
| P1_LIT_9  | Parma 1         | Litter          | 106900                    | 96906                                  | 96906          | 3333           | 93573             |
| P1_LIT_10 | Parma 1         | Litter          | 102813                    | 91878                                  | 91878          | 3946           | 87932             |
| P1_PC_1   | Parma 1         | Parmesan Cheese | 67927                     | 62348                                  | 62348          | 10167          | 52181             |
| P1_PC_2   | Parma 1         | Parmesan Cheese | 85344                     | 79271                                  | 79271          | 8497           | 70774             |
| P1_PC_3   | Parma 1         | Parmesan Cheese | 68710                     | 62840                                  | 62840          | 8598           | 54242             |
| P2_CF_1   | Parma 2         | faecal          | 87450                     | 81175                                  | 81175          | 4340           | 76835             |
| P2_CF_2   | Parma 2         | faecal          | 76813                     | 72475                                  | 72475          | 3638           | 68837             |
| P2_CF_3   | Parma 2         | faecal          | 75101                     | 71623                                  | 71623          | 2816           | 68807             |
| P2_CF_4   | Parma 2         | faecal          | 70484                     | 67140                                  | 67140          | 2619           | 64521             |
| P2_CF_5   | Parma 2         | faecal          | 77298                     | 71499                                  | 71499          | 2827           | 68672             |
| P2_CF_6   | Parma 2         | faecal          | 82026                     | 76551                                  | 76551          | 4318           | 72233             |
| P2_CF_7   | Parma 2         | faecal          | 79731                     | 70424                                  | 70424          | 3257           | 67167             |
| P2_CF_8   | Parma 2         | faecal          | 76632                     | 72630                                  | 72630          | 4494           | 68136             |
| P2_CF_9   | Parma 2         | faecal          | 76644                     | 72321                                  | 72321          | 3409           | 68912             |

|           |         |                 |        |        |        |       |        |
|-----------|---------|-----------------|--------|--------|--------|-------|--------|
| P2_CF_10  | Parma 2 | faecal          | 86479  | 82055  | 82055  | 5107  | 76948  |
| P2_MIL_1  | Parma 2 | Milk            | 104711 | 70116  | 70116  | 1091  | 69025  |
| P2_MIL_2  | Parma 2 | Milk            | 86450  | 69386  | 69386  | 2035  | 67351  |
| P2_MIL_3  | Parma 2 | Milk            | 78719  | 66238  | 66238  | 609   | 65629  |
| P2_MIL_4  | Parma 2 | Milk            | 86986  | 74984  | 74984  | 1067  | 73917  |
| P2_MIL_5  | Parma 2 | Milk            | 86812  | 61801  | 61801  | 170   | 61631  |
| P2_MIL_6  | Parma 2 | Milk            | 89686  | 64166  | 64166  | 1517  | 62649  |
| P2_MIL_7  | Parma 2 | Milk            | 106779 | 88043  | 88043  | 1168  | 86875  |
| P2_MIL_8  | Parma 2 | Milk            | 79107  | 69529  | 69529  | 3917  | 65612  |
| P2_MIL_9  | Parma 2 | Milk            | 79386  | 70097  | 70097  | 7302  | 62795  |
| P2_MIL_10 | Parma 2 | Milk            | 78766  | 69706  | 69706  | 6628  | 63078  |
| P2_LIT_1  | Parma 2 | Litter          | 73387  | 68391  | 68391  | 2930  | 65461  |
| P2_LIT_2  | Parma 2 | Litter          | 65911  | 62467  | 62467  | 1481  | 60986  |
| P2_LIT_3  | Parma 2 | Litter          | 102916 | 98041  | 98041  | 3620  | 94421  |
| P2_LIT_4  | Parma 2 | Litter          | 79949  | 76350  | 76350  | 4102  | 72248  |
| P2_LIT_5  | Parma 2 | Litter          | 71313  | 68152  | 68152  | 1599  | 66553  |
| P2_LIT_6  | Parma 2 | Litter          | 63274  | 59145  | 59145  | 1657  | 57488  |
| P2_LIT_7  | Parma 2 | Litter          | 83238  | 78418  | 78418  | 4285  | 74133  |
| P2_LIT_8  | Parma 2 | Litter          | 89330  | 83324  | 83324  | 884   | 82440  |
| P2_LIT_9  | Parma 2 | Litter          | 76203  | 71673  | 71673  | 2257  | 69416  |
| P2_LIT_10 | Parma 2 | Litter          | 140909 | 134090 | 134090 | 11866 | 122224 |
| P2_PC_1   | Parma 2 | Parmesan Cheese | 87214  | 82377  | 82377  | 10613 | 71764  |
| P2_PC_2   | Parma 2 | Parmesan Cheese | 70579  | 67297  | 67297  | 9058  | 58239  |
| P2_PC_3   | Parma 2 | Parmesan Cheese | 71218  | 67459  | 67459  | 9447  | 58012  |
| P3_CF_1   | Parma 3 | faecal          | 59946  | 46148  | 46148  | 3253  | 42895  |
| P3_CF_2   | Parma 3 | faecal          | 53921  | 37503  | 37503  | 3242  | 34261  |
| P3_CF_3   | Parma 3 | faecal          | 90545  | 38875  | 38875  | 2973  | 35902  |
| P3_CF_4   | Parma 3 | faecal          | 64028  | 51721  | 51721  | 5095  | 46626  |
| P3_CF_5   | Parma 3 | faecal          | 67288  | 47563  | 47563  | 5040  | 42523  |
| P3_CF_6   | Parma 3 | faecal          | 54215  | 37028  | 37028  | 1515  | 35513  |
| P3_CF_7   | Parma 3 | faecal          | 48765  | 36431  | 36431  | 2777  | 33654  |
| P3_CF_8   | Parma 3 | faecal          | 55564  | 36242  | 36242  | 3344  | 32898  |
| P3_CF_9   | Parma 3 | faecal          | 64996  | 26131  | 26131  | 2511  | 23620  |
| P3_CF_10  | Parma 3 | faecal          | 53689  | 43507  | 43507  | 5984  | 37523  |
| P3_MIL_1  | Parma 3 | Milk            | 43625  | 35653  | 35653  | 2405  | 33248  |
| P3_MIL_2  | Parma 3 | Milk            | 61933  | 27679  | 27679  | 1703  | 25976  |
| P3_MIL_3  | Parma 3 | Milk            | 46912  | 44603  | 44603  | 657   | 43946  |
| P3_MIL_4  | Parma 3 | Milk            | 64014  | 26201  | 26201  | 505   | 25696  |
| P3_MIL_5  | Parma 3 | Milk            | 10993  | 1173   | 1173   | 22    | 1151   |
| P3_MIL_6  | Parma 3 | Milk            | 54540  | 53226  | 53226  | 1642  | 51584  |
| P3_MIL_7  | Parma 3 | Milk            | 16502  | 12236  | 12236  | 260   | 11976  |
| P3_MIL_8  | Parma 3 | Milk            | 70591  | 9734   | 9734   | 136   | 9598   |
| P3_MIL_9  | Parma 3 | Milk            | 72158  | 30751  | 30751  | 785   | 29966  |
| P3_MIL_10 | Parma 3 | Milk            | 64849  | 29243  | 29243  | 2173  | 27070  |
| P3_LIT_1  | Parma 3 | Litter          | 55111  | 52187  | 52187  | 7271  | 44916  |

|                   |                 |                 |       |       |       |       |       |
|-------------------|-----------------|-----------------|-------|-------|-------|-------|-------|
| <b>P3_LIT_2</b>   | Parma 3         | Litter          | 51816 | 48209 | 48209 | 3988  | 44221 |
| <b>P3_LIT_3</b>   | Parma 3         | Litter          | 58080 | 54126 | 54126 | 16772 | 37354 |
| <b>P3_LIT_4</b>   | Parma 3         | Litter          | 44520 | 42019 | 42019 | 5240  | 36779 |
| <b>P3_LIT_5</b>   | Parma 3         | Litter          | 53455 | 50373 | 50373 | 14411 | 35962 |
| <b>P3_LIT_6</b>   | Parma 3         | Litter          | 57471 | 53748 | 53748 | 8552  | 45196 |
| <b>P3_LIT_7</b>   | Parma 3         | Litter          | 75964 | 71587 | 71587 | 12291 | 59296 |
| <b>P3_LIT_8</b>   | Parma 3         | Litter          | 61009 | 57597 | 57597 | 4938  | 52659 |
| <b>P3_LIT_9</b>   | Parma 3         | Litter          | 52378 | 48688 | 48688 | 3695  | 44993 |
| <b>P3_LIT_10</b>  | Parma 3         | Litter          | 57326 | 53401 | 53401 | 5185  | 48216 |
| <b>P3_PC_1</b>    | Parma 3         | Parmesan Cheese | 41523 | 32600 | 32600 | 4676  | 27924 |
| <b>P3_PC_2</b>    | Parma 3         | Parmesan Cheese | 58337 | 22358 | 22358 | 2385  | 19973 |
| <b>P3_PC_3</b>    | Parma 3         | Parmesan Cheese | 60747 | 33849 | 33849 | 5080  | 28769 |
| <b>RE1_CF_1</b>   | Reggio Emilia 1 | faecal          | 71327 | 50941 | 50941 | 4189  | 46752 |
| <b>RE1_CF_2</b>   | Reggio Emilia 1 | faecal          | 62554 | 52380 | 52380 | 4179  | 48201 |
| <b>RE1_CF_3</b>   | Reggio Emilia 1 | faecal          | 62468 | 54705 | 54705 | 5008  | 49697 |
| <b>RE1_CF_4</b>   | Reggio Emilia 1 | faecal          | 57532 | 54902 | 54902 | 5781  | 49121 |
| <b>RE1_CF_5</b>   | Reggio Emilia 1 | faecal          | 51793 | 44971 | 44971 | 3613  | 41358 |
| <b>RE1_CF_6</b>   | Reggio Emilia 1 | faecal          | 68040 | 50481 | 50481 | 4025  | 46456 |
| <b>RE1_CF_7</b>   | Reggio Emilia 1 | faecal          | 61049 | 54467 | 54467 | 3728  | 50739 |
| <b>RE1_CF_8</b>   | Reggio Emilia 1 | faecal          | 69710 | 42128 | 42128 | 1997  | 40131 |
| <b>RE1_CF_9</b>   | Reggio Emilia 1 | faecal          | 54805 | 48442 | 48442 | 4530  | 43912 |
| <b>RE1_CF_10</b>  | Reggio Emilia 1 | faecal          | 77102 | 68699 | 68699 | 6452  | 62247 |
| <b>RE1_MIL_1</b>  | Reggio Emilia 1 | Milk            | 52384 | 17875 | 17875 | 466   | 17409 |
| <b>RE1_MIL_2</b>  | Reggio Emilia 1 | Milk            | 77090 | 28236 | 28236 | 604   | 27632 |
| <b>RE1_MIL_3</b>  | Reggio Emilia 1 | Milk            | 70540 | 45068 | 45068 | 1093  | 43975 |
| <b>RE1_MIL_4</b>  | Reggio Emilia 1 | Milk            | 48963 | 34726 | 34726 | 1035  | 33691 |
| <b>RE1_MIL_5</b>  | Reggio Emilia 1 | Milk            | 66884 | 36890 | 36890 | 937   | 35953 |
| <b>RE1_MIL_6</b>  | Reggio Emilia 1 | Milk            | 61615 | 16961 | 16961 | 279   | 16682 |
| <b>RE1_MIL_7</b>  | Reggio Emilia 1 | Milk            | 49298 | 42948 | 42948 | 501   | 42447 |
| <b>RE1_MIL_8</b>  | Reggio Emilia 1 | Milk            | 56383 | 45681 | 45681 | 638   | 45043 |
| <b>RE1_MIL_9</b>  | Reggio Emilia 1 | Milk            | 57338 | 25301 | 25301 | 627   | 24674 |
| <b>RE1_MIL_10</b> | Reggio Emilia 1 | Milk            | 68195 | 32900 | 32900 | 638   | 32262 |
| <b>RE1_LIT_1</b>  | Reggio Emilia 1 | Litter          | 56593 | 53565 | 53565 | 10784 | 42781 |
| <b>RE1_LIT_2</b>  | Reggio Emilia 1 | Litter          | 59650 | 56215 | 56215 | 10633 | 45582 |
| <b>RE1_LIT_3</b>  | Reggio Emilia 1 | Litter          | 57331 | 55293 | 55293 | 7476  | 47817 |
| <b>RE1_LIT_4</b>  | Reggio Emilia 1 | Litter          | 46438 | 44019 | 44019 | 8323  | 35696 |
| <b>RE1_LIT_5</b>  | Reggio Emilia 1 | Litter          | 48458 | 46335 | 46335 | 10346 | 35989 |
| <b>RE1_LIT_6</b>  | Reggio Emilia 1 | Litter          | 52818 | 50749 | 50749 | 7571  | 43178 |
| <b>RE1_LIT_7</b>  | Reggio Emilia 1 | Litter          | 55835 | 52704 | 52704 | 11479 | 41225 |
| <b>RE1_LIT_8</b>  | Reggio Emilia 1 | Litter          | 34313 | 32822 | 32822 | 5437  | 27385 |
| <b>RE1_LIT_9</b>  | Reggio Emilia 1 | Litter          | 57583 | 55522 | 55522 | 3681  | 51841 |
| <b>RE1_LIT_10</b> | Reggio Emilia 1 | Litter          | 55760 | 53665 | 53665 | 7847  | 45818 |
| <b>RE1_PC_1</b>   | Reggio Emilia 1 | Parmesan Cheese | 47596 | 40702 | 40702 | 9956  | 30746 |
| <b>RE1_PC_2</b>   | Reggio Emilia 1 | Parmesan Cheese | 85695 | 51179 | 51179 | 5816  | 45363 |
| <b>RE1_PC_3</b>   | Reggio Emilia 1 | Parmesan Cheese | 58137 | 50793 | 50793 | 12936 | 37857 |



|            |                 |                 |       |       |       |      |       |
|------------|-----------------|-----------------|-------|-------|-------|------|-------|
| RE2_CF_1   | Reggio Emilia 2 | faecal          | 77032 | 67899 | 67899 | 2210 | 65689 |
| RE2_CF_2   | Reggio Emilia 2 | faecal          | 78315 | 70992 | 70992 | 2430 | 68562 |
| RE2_CF_3   | Reggio Emilia 2 | faecal          | 66571 | 48325 | 48325 | 1469 | 46856 |
| RE2_CF_4   | Reggio Emilia 2 | faecal          | 74439 | 55281 | 55281 | 2497 | 52784 |
| RE2_CF_5   | Reggio Emilia 2 | faecal          | 73675 | 60608 | 60608 | 1913 | 58695 |
| RE2_CF_6   | Reggio Emilia 2 | faecal          | 69338 | 61927 | 61927 | 3034 | 58893 |
| RE2_CF_7   | Reggio Emilia 2 | faecal          | 80506 | 54785 | 54785 | 2124 | 52661 |
| RE2_CF_8   | Reggio Emilia 2 | faecal          | 63840 | 31015 | 31015 | 1344 | 29671 |
| RE2_CF_9   | Reggio Emilia 2 | faecal          | 60168 | 57327 | 57327 | 2449 | 54878 |
| RE2_CF_10  | Reggio Emilia 2 | faecal          | 53251 | 49168 | 49168 | 3827 | 45341 |
| RE2_MIL_1  | Reggio Emilia 2 | Milk            | 54464 | 45391 | 45391 | 518  | 44873 |
| RE2_MIL_2  | Reggio Emilia 2 | Milk            | 57466 | 52807 | 52807 | 4420 | 48387 |
| RE2_MIL_3  | Reggio Emilia 2 | Milk            | 48404 | 44322 | 44322 | 4206 | 40116 |
| RE2_MIL_4  | Reggio Emilia 2 | Milk            | 69597 | 61771 | 61771 | 2346 | 59425 |
| RE2_MIL_5  | Reggio Emilia 2 | Milk            | 46915 | 41655 | 41655 | 1350 | 40305 |
| RE2_MIL_6  | Reggio Emilia 2 | Milk            | 72485 | 51295 | 51295 | 2953 | 48342 |
| RE2_MIL_7  | Reggio Emilia 2 | Milk            | 50773 | 36956 | 36956 | 1915 | 35041 |
| RE2_MIL_8  | Reggio Emilia 2 | Milk            | 52980 | 44040 | 44040 | 483  | 43557 |
| RE2_MIL_9  | Reggio Emilia 2 | Milk            | 53605 | 47389 | 47389 | 1872 | 45517 |
| RE2_MIL_10 | Reggio Emilia 2 | Milk            | 55137 | 45489 | 45489 | 382  | 45107 |
| RE2_LIT_1  | Reggio Emilia 2 | Litter          | 70941 | 66936 | 66936 | 1424 | 65512 |
| RE2_LIT_2  | Reggio Emilia 2 | Litter          | 70680 | 66245 | 66245 | 2594 | 63651 |
| RE2_LIT_3  | Reggio Emilia 2 | Litter          | 77145 | 70298 | 70298 | 459  | 69839 |
| RE2_LIT_4  | Reggio Emilia 2 | Litter          | 66400 | 61805 | 61805 | 2696 | 59109 |
| RE2_LIT_5  | Reggio Emilia 2 | Litter          | 71428 | 66486 | 66486 | 332  | 66154 |
| RE2_LIT_6  | Reggio Emilia 2 | Litter          | 75226 | 68962 | 68962 | 1696 | 67266 |
| RE2_LIT_7  | Reggio Emilia 2 | Litter          | 68642 | 64760 | 64760 | 303  | 64457 |
| RE2_LIT_8  | Reggio Emilia 2 | Litter          | 74696 | 69821 | 69821 | 722  | 69099 |
| RE2_LIT_9  | Reggio Emilia 2 | Litter          | 71044 | 67325 | 67325 | 1861 | 65464 |
| RE2_LIT_10 | Reggio Emilia 2 | Litter          | 77393 | 72620 | 72620 | 3922 | 68698 |
| RE2_PC_1   | Reggio Emilia 2 | Parmesan Cheese | 47693 | 41261 | 41261 | 3934 | 37327 |
| RE2_PC_2   | Reggio Emilia 2 | Parmesan Cheese | 48346 | 31533 | 31533 | 5067 | 26466 |
| RE2_PC_3   | Reggio Emilia 2 | Parmesan Cheese | 60244 | 47658 | 47658 | 4826 | 42832 |

**Supplementary Table 3: Quality-filtering table of bifidobacterial ITS profiling datasets.**

| Sample    | Production site | Matrix          | Number of sequenced pe reads | Number of pe reads with mean quality > 20 | Number of merged pe reads | No bacterial sequences | Ambiguous bases | Homopolymers > 7 | Mismatch in primers >1 | Reverse primer not found | Final Read Number |
|-----------|-----------------|-----------------|------------------------------|-------------------------------------------|---------------------------|------------------------|-----------------|------------------|------------------------|--------------------------|-------------------|
| P1_CF_1   | Parma 1         | faecal          | 112413                       | 111506                                    | 93790                     | 3                      | 0               | 1                | 1393                   | 715                      | 91678             |
| P1_CF_2   | Parma 1         | faecal          | 113125                       | 112135                                    | 96164                     | 0                      | 0               | 20               | 1370                   | 771                      | 94003             |
| P1_CF_3   | Parma 1         | faecal          | 119972                       | 118745                                    | 95180                     | 5                      | 0               | 5                | 1453                   | 714                      | 93003             |
| P1_CF_4   | Parma 1         | faecal          | 119236                       | 114776                                    | 100226                    | 1                      | 0               | 15               | 1398                   | 878                      | 97934             |
| P1_CF_5   | Parma 1         | faecal          | 161886                       | 160210                                    | 130422                    | 2                      | 0               | 34               | 1950                   | 1122                     | 127314            |
| P1_CF_6   | Parma 1         | faecal          | 128627                       | 127445                                    | 107201                    | 0                      | 0               | 18               | 1562                   | 675                      | 104946            |
| P1_CF_7   | Parma 1         | faecal          | 96246                        | 93467                                     | 80170                     | 0                      | 0               | 9                | 1253                   | 725                      | 78183             |
| P1_CF_8   | Parma 1         | faecal          | 103155                       | 102438                                    | 86540                     | 1                      | 0               | 2                | 1194                   | 699                      | 84644             |
| P1_CF_9   | Parma 1         | faecal          | 75867                        | 53808                                     | 46440                     | 0                      | 0               | 5                | 814                    | 477                      | 45144             |
| P1_CF_10  | Parma 1         | faecal          | 131839                       | 130549                                    | 108238                    | 0                      | 0               | 21               | 1640                   | 696                      | 105881            |
| P1_MIL_1  | Parma 1         | Milk            | 65572                        | 64263                                     | 54196                     | 0                      | 0               | 13               | 933                    | 398                      | 52852             |
| P1_MIL_2  | Parma 1         | Milk            | 48776                        | 47394                                     | 39876                     | 0                      | 0               | 12               | 592                    | 353                      | 38919             |
| P1_MIL_3  | Parma 1         | Milk            | 68393                        | 66791                                     | 50645                     | 0                      | 0               | 12               | 1036                   | 456                      | 49141             |
| P1_MIL_4  | Parma 1         | Milk            | 73965                        | 73110                                     | 57390                     | 0                      | 0               | 8                | 966                    | 473                      | 55943             |
| P1_MIL_5  | Parma 1         | Milk            | 84680                        | 81706                                     | 69452                     | 0                      | 0               | 21               | 1203                   | 658                      | 67570             |
| P1_MIL_6  | Parma 1         | Milk            | 72378                        | 71403                                     | 56559                     | 42                     | 0               | 10               | 912                    | 531                      | 55064             |
| P1_MIL_7  | Parma 1         | Milk            | 127548                       | 125801                                    | 102588                    | 0                      | 0               | 14               | 1856                   | 806                      | 99912             |
| P1_MIL_8  | Parma 1         | Milk            | 104062                       | 102846                                    | 81473                     | 0                      | 0               | 62               | 1438                   | 584                      | 79389             |
| P1_MIL_9  | Parma 1         | Milk            | 43835                        | 43060                                     | 34796                     | 1                      | 0               | 6                | 826                    | 327                      | 33636             |
| P1_MIL_10 | Parma 1         | Milk            | 99402                        | 98385                                     | 78986                     | 9                      | 0               | 10               | 1059                   | 572                      | 77336             |
| P1_PC_1   | Parma 1         | Parmesan Cheese | 80778                        | 79954                                     | 68894                     | 1                      | 1               | 3                | 1246                   | 753                      | 66890             |
| P1_PC_2   | Parma 1         | Parmesan Cheese | 110832                       | 109165                                    | 85963                     | 3                      | 0               | 2                | 1730                   | 863                      | 83365             |
| P1_PC_3   | Parma 1         | Parmesan Cheese | 123825                       | 122489                                    | 97597                     | 0                      | 0               | 0                | 1870                   | 980                      | 94747             |
| P2_CF_1   | Parma 2         | faecal          | 76438                        | 75603                                     | 65712                     | 1                      | 0               | 3                | 937                    | 590                      | 64181             |
| P2_CF_2   | Parma 2         | faecal          | 88293                        | 86655                                     | 74691                     | 2                      | 0               | 14               | 1093                   | 618                      | 72964             |
| P2_CF_3   | Parma 2         | faecal          | 104069                       | 102570                                    | 81358                     | 6                      | 0               | 48               | 1316                   | 698                      | 79290             |
| P2_CF_4   | Parma 2         | faecal          | 78379                        | 76305                                     | 65358                     | 3                      | 0               | 29               | 884                    | 556                      | 63886             |
| P2_CF_5   | Parma 2         | faecal          | 115281                       | 111492                                    | 98482                     | 2                      | 0               | 29               | 1396                   | 819                      | 96236             |
| P2_CF_6   | Parma 2         | faecal          | 80515                        | 79523                                     | 64254                     | 0                      | 0               | 26               | 936                    | 510                      | 62782             |
| P2_CF_7   | Parma 2         | faecal          | 102689                       | 101592                                    | 85286                     | 1                      | 0               | 24               | 1158                   | 676                      | 83427             |
| P2_CF_8   | Parma 2         | faecal          | 91087                        | 89213                                     | 77840                     | 0                      | 0               | 5                | 1295                   | 619                      | 75921             |
| P2_CF_9   | Parma 2         | faecal          | 104982                       | 103359                                    | 82484                     | 6                      | 0               | 26               | 1240                   | 708                      | 80504             |
| P2_CF_10  | Parma 2         | faecal          | 109645                       | 107945                                    | 87356                     | 0                      | 0               | 22               | 1273                   | 718                      | 85343             |
| P2_MIL_1  | Parma 2         | Milk            | 123199                       | 122011                                    | 96830                     | 3                      | 0               | 20               | 1536                   | 754                      | 94517             |
| P2_MIL_2  | Parma 2         | Milk            | 115284                       | 114254                                    | 93748                     | 6                      | 0               | 3                | 1510                   | 573                      | 91656             |
| P2_MIL_3  | Parma 2         | Milk            | 108551                       | 107643                                    | 89790                     | 3                      | 0               | 21               | 1372                   | 766                      | 87628             |
| P2_MIL_4  | Parma 2         | Milk            | 103622                       | 102002                                    | 75058                     | 12                     | 0               | 6                | 1488                   | 746                      | 72806             |

|           |                 |                 |        |        |        |       |   |     |       |      |        |
|-----------|-----------------|-----------------|--------|--------|--------|-------|---|-----|-------|------|--------|
| P2_MIL_5  | Parma 2         | Milk            | 92800  | 91548  | 70967  | 1     | 0 | 10  | 1149  | 530  | 69277  |
| P2_MIL_6  | Parma 2         | Milk            | 127082 | 125960 | 103872 | 0     | 0 | 34  | 1620  | 877  | 101341 |
| P2_MIL_7  | Parma 2         | Milk            | 94015  | 92677  | 70892  | 6     | 0 | 15  | 1391  | 640  | 68840  |
| P2_MIL_8  | Parma 2         | Milk            | 134624 | 132796 | 118391 | 1     | 0 | 19  | 2070  | 1014 | 115287 |
| P2_MIL_9  | Parma 2         | Milk            | 73776  | 71640  | 61275  | 3     | 0 | 8   | 814   | 462  | 59988  |
| P2_MIL_10 | Parma 2         | Milk            | 121755 | 120341 | 94670  | 3     | 0 | 4   | 1529  | 708  | 92426  |
| P2_PC_1   | Parma 2         | Parmesan Cheese | 75671  | 74921  | 61991  | 8     | 0 | 1   | 884   | 459  | 60639  |
| P2_PC_2   | Parma 2         | Parmesan Cheese | 79119  | 78300  | 65576  | 7     | 0 | 5   | 902   | 472  | 64190  |
| P2_PC_3   | Parma 2         | Parmesan Cheese | 122328 | 120757 | 94346  | 4     | 0 | 7   | 1559  | 630  | 92146  |
| P3_CF_1   | Parma 3         | faecal          | 59946  | 58227  | 55028  | 8     | 0 | 3   | 46437 | 84   | 8496   |
| P3_CF_2   | Parma 3         | faecal          | 53921  | 51817  | 48719  | 0     | 0 | 1   | 37909 | 150  | 10659  |
| P3_CF_3   | Parma 3         | faecal          | 90545  | 83361  | 75655  | 45    | 0 | 10  | 39651 | 340  | 35609  |
| P3_CF_4   | Parma 3         | faecal          | 64028  | 62101  | 59345  | 50    | 0 | 2   | 52176 | 78   | 7039   |
| P3_CF_5   | Parma 3         | faecal          | 67288  | 65535  | 61692  | 0     | 1 | 11  | 48051 | 168  | 13461  |
| P3_CF_6   | Parma 3         | faecal          | 54215  | 51466  | 47512  | 138   | 0 | 4   | 36964 | 92   | 10314  |
| P3_CF_7   | Parma 3         | faecal          | 48765  | 47217  | 44548  | 1     | 0 | 1   | 36822 | 64   | 7660   |
| P3_CF_8   | Parma 3         | faecal          | 55564  | 53535  | 49933  | 2     | 0 | 5   | 36704 | 132  | 13090  |
| P3_CF_9   | Parma 3         | faecal          | 64996  | 60756  | 54045  | 1     | 0 | 7   | 26577 | 293  | 27167  |
| P3_CF_10  | Parma 3         | faecal          | 53689  | 51218  | 48801  | 0     | 0 | 9   | 43562 | 72   | 5158   |
| P3_MIL_1  | Parma 3         | Milk            | 43625  | 42492  | 39821  | 2     | 0 | 6   | 35892 | 61   | 3860   |
| P3_MIL_2  | Parma 3         | Milk            | 61933  | 57848  | 52574  | 4     | 0 | 2   | 28227 | 272  | 24069  |
| P3_MIL_3  | Parma 3         | Milk            | 61645  | 60782  | 53908  | 4     | 1 | 8   | 8159  | 384  | 45352  |
| P3_MIL_4  | Parma 3         | Milk            | 64014  | 63286  | 58329  | 0     | 0 | 8   | 26613 | 232  | 31476  |
| P3_MIL_5  | Parma 3         | Milk            | 64573  | 63980  | 55747  | 8     | 0 | 4   | 722   | 349  | 54664  |
| P3_MIL_6  | Parma 3         | Milk            | 57172  | 48851  | 38124  | 14842 | 0 | 21  | 11178 | 131  | 11951  |
| P3_MIL_7  | Parma 3         | Milk            | 82585  | 66636  | 54572  | 15889 | 1 | 35  | 7608  | 358  | 30681  |
| P3_MIL_8  | Parma 3         | Milk            | 70591  | 66760  | 56779  | 1     | 0 | 15  | 10587 | 415  | 45761  |
| P3_MIL_9  | Parma 3         | Milk            | 72158  | 50798  | 46650  | 977   | 1 | 2   | 29949 | 186  | 15535  |
| P3_MIL_10 | Parma 3         | Milk            | 64849  | 60653  | 53796  | 2010  | 0 | 8   | 27110 | 216  | 24452  |
| P3_PC_1   | Parma 3         | Parmesan Cheese | 41523  | 40573  | 38351  | 2     | 0 | 0   | 33075 | 39   | 5235   |
| P3_PC_2   | Parma 3         | Parmesan Cheese | 58337  | 57540  | 28063  | 20    | 0 | 1   | 22825 | 44   | 5173   |
| P3_PC_3   | Parma 3         | Parmesan Cheese | 60747  | 60273  | 55239  | 2     | 1 | 0   | 34447 | 149  | 20640  |
| RE1_CF_1  | Reggio Emilia 1 | faecal          | 71327  | 69551  | 66088  | 2     | 1 | 6   | 51487 | 129  | 14463  |
| RE1_CF_2  | Reggio Emilia 1 | faecal          | 62554  | 59742  | 57343  | 24    | 1 | 3   | 52692 | 51   | 4572   |
| RE1_CF_3  | Reggio Emilia 1 | faecal          | 62468  | 60740  | 58362  | 22    | 0 | 3   | 54989 | 28   | 3320   |
| RE1_CF_4  | Reggio Emilia 1 | faecal          | 77261  | 52749  | 45495  | 0     | 0 | 114 | 813   | 447  | 44121  |
| RE1_CF_5  | Reggio Emilia 1 | faecal          | 51793  | 50454  | 48326  | 48    | 0 | 5   | 45197 | 29   | 3047   |
| RE1_CF_6  | Reggio Emilia 1 | faecal          | 68040  | 61625  | 59109  | 17    | 0 | 5   | 50896 | 80   | 8111   |
| RE1_CF_7  | Reggio Emilia 1 | faecal          | 61049  | 59670  | 57541  | 52    | 0 | 6   | 54697 | 33   | 2753   |
| RE1_CF_8  | Reggio Emilia 1 | faecal          | 69710  | 60861  | 57302  | 25    | 1 | 6   | 42459 | 166  | 14645  |
| RE1_CF_9  | Reggio Emilia 1 | faecal          | 54805  | 53648  | 51519  | 67    | 0 | 5   | 48557 | 40   | 2850   |
| RE1_CF_10 | Reggio Emilia 1 | faecal          | 77102  | 73673  | 71726  | 23    | 0 | 38  | 69095 | 23   | 2547   |
| RE1_MIL_1 | Reggio Emilia 1 | Milk            | 52384  | 48569  | 40127  | 4608  | 1 | 10  | 10888 | 152  | 24468  |
| RE1_MIL_2 | Reggio Emilia 1 | Milk            | 77090  | 71799  | 61866  | 1891  | 0 | 3   | 26875 | 299  | 32798  |
| RE1_MIL_3 | Reggio Emilia 1 | Milk            | 70540  | 65960  | 59401  | 2632  | 0 | 10  | 42081 | 177  | 14501  |

|            |                 |                 |       |       |       |       |   |    |       |     |       |
|------------|-----------------|-----------------|-------|-------|-------|-------|---|----|-------|-----|-------|
| RE1_MIL_4  | Reggio Emilia 1 | Milk            | 48963 | 47279 | 42917 | 2712  | 1 | 9  | 31127 | 80  | 8988  |
| RE1_MIL_5  | Reggio Emilia 1 | Milk            | 66884 | 61173 | 51151 | 13632 | 0 | 12 | 21791 | 194 | 15522 |
| RE1_MIL_6  | Reggio Emilia 1 | Milk            | 61615 | 51524 | 39898 | 2893  | 4 | 16 | 13079 | 356 | 23550 |
| RE1_MIL_7  | Reggio Emilia 1 | Milk            | 49298 | 47606 | 44577 | 11735 | 1 | 6  | 30521 | 16  | 2298  |
| RE1_MIL_8  | Reggio Emilia 1 | Milk            | 56383 | 52943 | 49265 | 13688 | 3 | 5  | 31300 | 60  | 4209  |
| RE1_MIL_9  | Reggio Emilia 1 | Milk            | 57338 | 53336 | 42714 | 10819 | 1 | 34 | 13303 | 220 | 18337 |
| RE1_MIL_10 | Reggio Emilia 1 | Milk            | 68195 | 60123 | 55079 | 3108  | 0 | 7  | 29756 | 202 | 22006 |
| RE1_PC_1   | Reggio Emilia 1 | Parmesan Cheese | 47596 | 46227 | 44211 | 33    | 5 | 0  | 41025 | 29  | 3119  |
| RE1_PC_2   | Reggio Emilia 1 | Parmesan Cheese | 85695 | 84502 | 58857 | 25    | 0 | 1  | 51821 | 99  | 6911  |
| RE1_PC_3   | Reggio Emilia 1 | Parmesan Cheese | 58137 | 56870 | 54676 | 77    | 1 | 0  | 51206 | 34  | 3358  |
| RE2_CF_1   | Reggio Emilia 2 | faecal          | 77032 | 76593 | 72606 | 16    | 0 | 5  | 66554 | 51  | 5980  |
| RE2_CF_2   | Reggio Emilia 2 | faecal          | 78970 | 50994 | 42989 | 0     | 0 | 2  | 868   | 412 | 41707 |
| RE2_CF_3   | Reggio Emilia 2 | faecal          | 66571 | 66085 | 61498 | 6     | 0 | 4  | 47545 | 134 | 13809 |
| RE2_CF_4   | Reggio Emilia 2 | faecal          | 74439 | 66762 | 61528 | 357   | 0 | 4  | 53006 | 70  | 8091  |
| RE2_CF_5   | Reggio Emilia 2 | faecal          | 73675 | 69281 | 65044 | 226   | 0 | 5  | 58905 | 51  | 5857  |
| RE2_CF_6   | Reggio Emilia 2 | faecal          | 69338 | 68270 | 64412 | 16    | 0 | 8  | 60678 | 41  | 3669  |
| RE2_CF_7   | Reggio Emilia 2 | faecal          | 80506 | 77153 | 69467 | 335   | 0 | 7  | 54587 | 162 | 14376 |
| RE2_CF_8   | Reggio Emilia 2 | faecal          | 63840 | 55602 | 48302 | 136   | 0 | 6  | 31180 | 181 | 16799 |
| RE2_CF_9   | Reggio Emilia 2 | faecal          | 67247 | 61377 | 55793 | 3808  | 0 | 10 | 43940 | 81  | 7956  |
| RE2_CF_10  | Reggio Emilia 2 | faecal          | 88315 | 65235 | 53580 | 0     | 0 | 3  | 886   | 516 | 52175 |
| RE2_MIL_1  | Reggio Emilia 2 | Milk            | 54464 | 53703 | 50933 | 1     | 0 | 4  | 45803 | 55  | 5070  |
| RE2_MIL_2  | Reggio Emilia 2 | Milk            | 57466 | 57006 | 54981 | 0     | 1 | 0  | 53373 | 25  | 1582  |
| RE2_MIL_3  | Reggio Emilia 2 | Milk            | 48404 | 47954 | 46228 | 0     | 0 | 0  | 44732 | 10  | 1486  |
| RE2_MIL_4  | Reggio Emilia 2 | Milk            | 69597 | 68558 | 65763 | 1     | 1 | 18 | 62329 | 33  | 3381  |
| RE2_MIL_5  | Reggio Emilia 2 | Milk            | 46915 | 46370 | 44483 | 1     | 0 | 2  | 41994 | 25  | 2461  |
| RE2_MIL_6  | Reggio Emilia 2 | Milk            | 72485 | 63663 | 61457 | 0     | 0 | 12 | 51645 | 90  | 9710  |
| RE2_MIL_7  | Reggio Emilia 2 | Milk            | 50773 | 50469 | 46688 | 0     | 1 | 0  | 37109 | 66  | 9512  |
| RE2_MIL_8  | Reggio Emilia 2 | Milk            | 52980 | 52461 | 49689 | 6     | 1 | 4  | 44638 | 61  | 4979  |
| RE2_MIL_9  | Reggio Emilia 2 | Milk            | 53605 | 53068 | 50808 | 0     | 0 | 5  | 47983 | 28  | 2792  |
| RE2_MIL_10 | Reggio Emilia 2 | Milk            | 55137 | 54184 | 51655 | 1     | 0 | 23 | 45871 | 58  | 5702  |
| RE2_PC_1   | Reggio Emilia 2 | Parmesan Cheese | 47693 | 47232 | 45400 | 8     | 4 | 0  | 41731 | 33  | 3624  |
| RE2_PC_2   | Reggio Emilia 2 | Parmesan Cheese | 48346 | 47893 | 33649 | 35    | 0 | 0  | 31699 | 22  | 1893  |
| RE2_PC_3   | Reggio Emilia 2 | Parmesan Cheese | 60244 | 59264 | 55566 | 4     | 1 | 0  | 48164 | 74  | 7323  |

**Supplementary Table 4:** Cow DNA filtering of shotgun metagenomics datasets.

| <b>Sample</b> | <b>Sequenced reads</b> | <b>Cow-filtered reads</b> |
|---------------|------------------------|---------------------------|
| P1_PC_1       | 37612529               | 37595526                  |
| P2_PC_1       | 25088478               | 21816623                  |
| P1_LIT_4      | 13703634               | 13682174                  |
| P2_LIT_8      | 12273062               | 12244806                  |
| P2_MIL_4      | 14200899               | 4976043                   |
| P2_MIL_8      | 19144692               | 7033929                   |
| P3_CF_9       | 14590125               | 14576473                  |
| RE1_CF_1      | 17439821               | 17437711                  |

**Supplementary Table 5:** Primers used to test strains transmission across the Parmesan cheese production chain

| <b>Species</b>                                        | <b>Forward Primer</b>  | <b>Reverse Primer</b>   |
|-------------------------------------------------------|------------------------|-------------------------|
| <i>Pseudothaxonomifactor capillosus</i>               | CGATGCAGAAGGAACCAAGG   | GGGTTGCATTTTCAATCGCG    |
| <i>Treponema porcinum</i>                             | TCTGGACTTTTGAACATGGAGC | CAGCACGCTTGAAACTGGTA    |
| <i>Prevotella ruminicola</i>                          | GATTTCCCGTTCCGTGCTTG   | TCGAACCGTAAACTCTGCCT    |
| <i>Paraprevotella clara</i>                           | TCCATCAGCACTCCCATTGT   | ATGCGTAACGTAGGGTGTCA    |
| <i>Corynebacterium stationis</i>                      | CTCAATATCAGCCGCGGAAC   | TTTCTGTATCACCGCAAGC     |
| <i>Oligella ureolytica</i>                            | ACGCACACTGAGACTGCAAG   | TGGTGGTACTGCTGGAGTTG    |
| <i>Jeotgallibacterium psychrophilus</i>               | TGTCTGATGACGACCGCTAC   | CCGGTGACACTGTTAATTGC    |
| <i>Atopostipes suicloacalis</i>                       | AACTTGGTCACTCCGTCATTG  | TCGCCACTTCAACATTGTGT    |
| <i>Pseudoclavibacter soli</i>                         | TCTGAACAGACTGCGACTGC   | AATCTGCTCTGCGATGTCCT    |
| <i>Kocuria kristinae</i>                              | ACGAGGTCTACGAGGTGCTG   | TCTGGTCTATGTCGCTGGTC    |
| <i>Corynebacterium variable</i>                       | GAGGAATCTTCTGCGAATG    | GCATTGTGCGAGTAGCTGAA    |
| <i>Lactobacillus delbrueckii</i> (P2)                 | AAGCAAGACCATAAGCAAGC   | TGCCGTTACATCAAGGTTCC    |
| <i>Lactobacillus delbrueckii</i> (P1)                 | GAACACTCTGGCTCTGCAAC   | TTGGTTGCCGATGATTTGCA    |
| <i>Streptococcus thermophilus</i>                     | GACCACCTTCAACTCCTCCA   | ATAGTTGGCAATTCCGTGCT    |
| <i>Lactobacillus helveticus</i>                       | CAGCGAGGACGTGTGAATAC   | TTGTACCAACTTGACGCATATAA |
| <i>Bifidobacterium mongoliense</i> (species-specific) | CGTTCGATGTGGTGCTTCAT   | AACCATCATGCCTCCCCATC    |
| <i>Bifidobacterium mongoliense</i> (strain-specific)  | TACCATTCCACCGTCAAACG   | AAAGGCGAACTTGGCGAGAC    |

**Supplementary Table 6: Shotgun metagenomics reads mapping using MetaSNV**

| Shotgun dataset mapped | Cheesemaking site where the genome was assembled | Genome                              | Average Genome Coverage |
|------------------------|--------------------------------------------------|-------------------------------------|-------------------------|
| P1_PC_1                | P2                                               | <i>Atopostipes suicloacalis</i>     | 0.0000                  |
|                        | P1                                               | <i>Bifidobacterium mongoliense</i>  | 1.8661                  |
|                        | P1                                               | <i>Corynebacterium stationis</i>    | 0.0022                  |
|                        | P1                                               | <i>Corynebacterium variabile</i>    | 2.0206                  |
|                        | P2                                               | <i>Jeotgalicoccus psychrophilus</i> | 0.0000                  |
|                        | P2                                               | <i>Lactobacillus delbrueckii</i>    | 0.0000                  |
|                        | P2                                               | <i>Lactobacillus helveticus</i>     | 0.0000                  |
|                        | P2                                               | <i>Oligella ureolytica</i>          | 0.0000                  |
|                        | P1                                               | <i>Pseudoclavibacter soli</i>       | 6.7860                  |
|                        | P2                                               | <i>Streptococcus thermophilus</i>   | 0.0000                  |
| P2_PC_1                | P2                                               | <i>Atopostipes suicloacalis</i>     | 0.0003                  |
|                        | P1                                               | <i>Bifidobacterium mongoliense</i>  | 0.0000                  |
|                        | P1                                               | <i>Corynebacterium stationis</i>    | 0.0000                  |
|                        | P1                                               | <i>Corynebacterium variabile</i>    | 0.0000                  |
|                        | P2                                               | <i>Jeotgalicoccus psychrophilus</i> | 0.0009                  |
|                        | P2                                               | <i>Lactobacillus delbrueckii</i>    | 100.7681                |
|                        | P2                                               | <i>Lactobacillus helveticus</i>     | 451.2940                |
|                        | P2                                               | <i>Oligella ureolytica</i>          | 0.0004                  |
|                        | P1                                               | <i>Pseudoclavibacter soli</i>       | 0.0000                  |
|                        | P2                                               | <i>Streptococcus thermophilus</i>   | 80.0155                 |

**Supplementary Table 7: *B. mongoliense* BMONG18 genes overexpressed (> 3 fold) during growth on milk respect to MRS + glucose.**

| ORFs         | MRS + Glucose<br>(Average RPKM) | MILK<br>(Average RPKM) | stDEV<br>MRS + Glucose | stDEV<br>MILK | Fold Increase in<br>MILK respect to<br>MRS + Glucose | ANOVA p-value | Functional<br>Annotation                         |
|--------------|---------------------------------|------------------------|------------------------|---------------|------------------------------------------------------|---------------|--------------------------------------------------|
| BMONG18_0277 | 5.22                            | 148.33                 | 5.57834396             | 40.49570133   | 27.4                                                 | 0.004         | pilus assembly protein TadE                      |
| BMONG18_0278 | 10.78                           | 148.45                 | 3.635073452            | 29.59783915   | 12.8                                                 | 0.001         | pilus biosynthesis protein TadE                  |
| BMONG18_0279 | 14.86                           | 74.01                  | 4.935472554            | 13.62964959   | 4.0                                                  | 0.002         | hypothetical protein                             |
| BMONG18_0280 | 5.00                            | 211.43                 | 3.764094048            | 48.76072418   | 41.3                                                 | 0.002         | type II secretion system protein, pilus assembly |
| BMONG18_0281 | 9.23                            | 378.26                 | 5.042041947            | 72.08882599   | 40.0                                                 | 0.001         | Flp pilus assembly protein                       |
| BMONG18_0282 | 9.11                            | 281.41                 | 1.411644077            | 58.05949244   | 29.9                                                 | 0.001         | type IV secretion system protein                 |
| BMONG18_0069 | 5.62                            | 114.35                 | 1.78267103             | 20.62538303   | 19.4                                                 | 0.001         | glucodextranase                                  |
| BMONG18_0138 | 6.82                            | 113.44                 | 4.261465632            | 39.90216313   | 15.6                                                 | 0.010         | glycosyl transferase                             |
| BMONG18_0464 | 23.72                           | 159.68                 | 3.34246082             | 28.58593141   | 5.7                                                  | 0.001         | alpha-acetolactate decarboxylase                 |
| BMONG18_0630 | 17.08                           | 76.35                  | 6.828910772            | 11.43190016   | 3.5                                                  | 0.002         | beta-galactosidase                               |
| BMONG18_0670 | 8.41                            | 152.67                 | 4.404553818            | 54.32421017   | 17.2                                                 | 0.010         | xylose isomerase                                 |
| BMONG18_0671 | 8.51                            | 141.20                 | 0.792785175            | 29.17351806   | 15.6                                                 | 0.001         | xylose isomerase                                 |
| BMONG18_1027 | 6.61                            | 123.72                 | 2.077225072            | 22.48313782   | 17.7                                                 | 0.001         | glycosyl transferase                             |
| BMONG18_1133 | 26.65                           | 177.33                 | 5.244837684            | 31.92936646   | 5.7                                                  | 0.001         | aryl-phospho-beta-D-glucosidase                  |
| BMONG18_1137 | 15.93                           | 108.49                 | 1.535193473            | 14.6699301    | 5.8                                                  | 0.000         | glycoside hydrolase                              |
| BMONG18_1144 | 12.97                           | 90.37                  | 3.128739416            | 21.87464576   | 6.0                                                  | 0.004         | alpha-galactosidase                              |
| BMONG18_1274 | 15.13                           | 85.66                  | 2.555441449            | 15.19882295   | 4.7                                                  | 0.001         | beta-fructofuranosidase                          |
| BMONG18_1385 | 5.78                            | 58.62                  | 0.961671981            | 12.28308253   | 9.1                                                  | 0.002         | beta-mannosidase                                 |
| BMONG18_1393 | 32.49                           | 126.04                 | 1.200825133            | 11.95696907   | 2.9                                                  | 0.000         | exo-alpha-sialidase                              |
| BMONG18_1481 | 2.30                            | 35.09                  | 2.37092858             | 6.705916716   | 14.2                                                 | 0.001         | glycosyl transferase family 9                    |
| BMONG18_1717 | 20.90                           | 244.98                 | 4.563583059            | 35.76583356   | 10.7                                                 | 0.000         | alpha-galactosidase                              |
| BMONG18_0006 | 14.52                           | 392.43                 | 4.49395405             | 65.88716768   | 26.0                                                 | 0.001         | major facilitator transporter                    |
| BMONG18_0049 | 56.03                           | 225.94                 | 7.498581888            | 37.38926761   | 3.0                                                  | 0.002         | gluconate transporter                            |
| BMONG18_0065 | 55.36                           | 265.00                 | 15.97760235            | 29.45440905   | 3.8                                                  | 0.000         | sugar ABC transporter permease                   |
| BMONG18_0066 | 39.57                           | 298.56                 | 12.23812291            | 44.95495986   | 6.5                                                  | 0.001         | sugar ABC transporter permease                   |
| BMONG18_0068 | 36.36                           | 161.84                 | 7.827247111            | 17.6277879    | 3.5                                                  | 0.000         | ABC transporter substrate-binding protein        |
| BMONG18_0105 | 25.24                           | 110.76                 | 2.045177335            | 15.39611519   | 3.4                                                  | 0.001         | sugar ABC transporter ATPase                     |
| BMONG18_0121 | 32.47                           | 137.72                 | 4.407304883            | 5.590407349   | 3.2                                                  | 0.000         | ABC transporter permease                         |
| BMONG18_0142 | 5.04                            | 134.20                 | 1.365861267            | 28.16078832   | 25.6                                                 | 0.001         | ABC transporter                                  |
| BMONG18_0145 | 16.67                           | 104.00                 | 2.172797045            | 19.37198215   | 5.2                                                  | 0.001         | ABC transporter ATP-binding protein              |
| BMONG18_0147 | 32.73                           | 183.19                 | 0.778821118            | 24.04870843   | 4.6                                                  | 0.000         | ABC transporter ATP-binding protein              |
| BMONG18_0150 | 27.04                           | 258.24                 | 3.468318084            | 53.30170393   | 8.5                                                  | 0.002         | ABC transporter permease                         |
| BMONG18_0151 | 13.18                           | 159.06                 | 3.471634245            | 30.82683056   | 11.1                                                 | 0.001         | ABC transporter permease                         |
| BMONG18_0152 | 18.00                           | 118.19                 | 5.827671605            | 21.24581933   | 5.6                                                  | 0.001         | ABC transporter substrate-binding protein        |
| BMONG18_0182 | 27.05                           | 193.65                 | 2.353565168            | 18.81825659   | 6.2                                                  | 0.000         | MFS transporter                                  |
| BMONG18_0404 | 14.73                           | 124.83                 | 3.633616701            | 14.12531391   | 7.5                                                  | 0.000         | ABC transporter                                  |
| BMONG18_0465 | 42.36                           | 194.93                 | 3.275014707            | 31.13535825   | 3.6                                                  | 0.001         | MFS permease                                     |
| BMONG18_0857 | 31.95                           | 154.22                 | 1.696082938            | 18.8982862    | 3.8                                                  | 0.000         | ABC transporter                                  |
| BMONG18_0979 | 6.70                            | 208.40                 | 2.339827558            | 38.41529802   | 30.1                                                 | 0.001         | ABC transporter ATP-binding protein              |



|              |        |        |             |             |      |       |                                        |
|--------------|--------|--------|-------------|-------------|------|-------|----------------------------------------|
| BMONG18_0980 | 23.75  | 521.45 | 4.455087915 | 76.23802605 | 21.0 | 0.000 | ABC transporter permease               |
| BMONG18_0981 | 31.28  | 297.74 | 4.714432309 | 45.52546357 | 8.5  | 0.001 | ABC transporter permease               |
| BMONG18_1014 | 73.99  | 306.66 | 3.13573362  | 12.48447966 | 3.1  | 0.000 | ABC transporter permease               |
| BMONG18_1029 | 30.94  | 300.27 | 8.890936415 | 50.56465634 | 8.7  | 0.001 | ABC transporter ATP-binding protein    |
| BMONG18_1061 | 13.71  | 190.85 | 2.315177387 | 43.02955441 | 12.9 | 0.002 | permease                               |
| BMONG18_1134 | 30.94  | 375.41 | 4.042475149 | 62.91536275 | 11.1 | 0.001 | PTS galactitol transporter subunit IIC |
| BMONG18_1276 | 17.33  | 250.01 | 2.445013701 | 46.31744557 | 13.4 | 0.001 | sugar ABC transporter permease         |
| BMONG18_1277 | 19.02  | 203.49 | 6.826106528 | 32.74822136 | 9.7  | 0.001 | sugar ABC transporter permease         |
| BMONG18_1305 | 35.66  | 386.55 | 6.531747801 | 69.78433504 | 9.8  | 0.001 | ABC transporter ATP-binding protein    |
| BMONG18_1451 | 46.28  | 375.44 | 3.372491858 | 21.55564035 | 7.1  | 0.000 | MFS transporter                        |
| BMONG18_1498 | 43.80  | 309.31 | 6.760756195 | 55.68996347 | 6.1  | 0.001 | ABC transporter ATP-binding protein    |
| BMONG18_1540 | 61.53  | 277.48 | 19.2518127  | 50.75402095 | 3.5  | 0.002 | MFS transporter                        |
| BMONG18_1733 | 45.37  | 237.79 | 5.674215717 | 38.11770222 | 4.2  | 0.001 | ABC 3 transport family                 |
| BMONG18_1734 | 44.68  | 180.61 | 3.620746102 | 28.81166684 | 3.0  | 0.001 | ABC transporter                        |
| BMONG18_1736 | 15.35  | 117.28 | 3.837615709 | 22.50769443 | 6.6  | 0.002 | ABC transporter permease               |
| BMONG18_1741 | 89.69  | 424.00 | 6.364522475 | 50.07007946 | 3.7  | 0.000 | ABC transporter permease               |
| BMONG18_1743 | 131.71 | 798.01 | 10.35668366 | 95.12671824 | 5.1  | 0.000 | ABC transporter ATP-binding protein    |

**Supplementary Table 8:** Filtering table of 16S rRNA gene microbial profiling datasets of the 20 individuals enrolled in the study

| <b>Sample</b> | <b>Group</b> | <b>input</b> | <b>filtered</b> | <b>denoised</b> | <b>merged</b> | <b>non-chimeric</b> |
|---------------|--------------|--------------|-----------------|-----------------|---------------|---------------------|
| Human_1_T0    | NoMilk       | 75403        | 59900           | 59900           | 58406         | 53683               |
| Human_1_T7    | NoMilk       | 46716        | 19737           | 19737           | 18584         | 18237               |
| Human_1_T14   | NoMilk       | 83857        | 35052           | 35052           | 34135         | 31969               |
| Human_2_T0    | NoMilk       | 70630        | 61012           | 61012           | 60190         | 56447               |
| Human_2_T7    | NoMilk       | 86726        | 39100           | 39100           | 38019         | 34932               |
| Human_2_T14   | NoMilk       | 68319        | 27838           | 27838           | 26546         | 25539               |
| Human_3_T0    | NoMilk       | 57714        | 42190           | 42190           | 41123         | 36735               |
| Human_3_T7    | NoMilk       | 83139        | 37387           | 37387           | 36139         | 34728               |
| Human_3_T14   | NoMilk       | 90693        | 33386           | 33386           | 32129         | 30366               |
| Human_4_T0    | NoMilk       | 65249        | 60746           | 60746           | 59360         | 51903               |
| Human_4_T7    | NoMilk       | 62994        | 26562           | 26562           | 25442         | 23641               |
| Human_4_T14   | NoMilk       | 98187        | 39375           | 39375           | 38134         | 36147               |
| Human_5_T0    | NoMilk       | 61967        | 56372           | 56372           | 55587         | 51668               |
| Human_5_T7    | NoMilk       | 74024        | 23476           | 23476           | 22938         | 21899               |
| Human_5_T14   | NoMilk       | 72695        | 27941           | 27941           | 27486         | 26249               |
| Human_6_T0    | NoMilk       | 63200        | 50267           | 50267           | 49588         | 46277               |
| Human_6_T7    | NoMilk       | 63948        | 26324           | 26324           | 25580         | 22296               |
| Human_6_T14   | NoMilk       | 74330        | 28037           | 28037           | 27329         | 25531               |
| Human_7_T0    | NoMilk       | 67387        | 57184           | 57184           | 56264         | 50769               |
| Human_7_T7    | NoMilk       | 71798        | 28398           | 28398           | 27665         | 24427               |
| Human_7_T14   | NoMilk       | 51931        | 18409           | 18409           | 17843         | 16100               |
| Human_8_T0    | NoMilk       | 69739        | 61963           | 61963           | 60825         | 59879               |
| Human_8_T7    | NoMilk       | 118203       | 51278           | 51278           | 48951         | 46446               |
| Human_8_T14   | NoMilk       | 57681        | 23717           | 23717           | 22846         | 22542               |
| Human_9_T0    | NoMilk       | 69473        | 61732           | 61732           | 60382         | 54550               |
| Human_9_T7    | NoMilk       | 181497       | 71148           | 71148           | 68135         | 61921               |
| Human_9_T14   | NoMilk       | 70628        | 21170           | 21170           | 20244         | 19238               |
| Human_10_T0   | NoMilk       | 85736        | 79385           | 79385           | 78465         | 72546               |
| Human_10_T7   | NoMilk       | 76029        | 68745           | 68745           | 65827         | 61298               |
| Human_10_T14  | NoMilk       | 110574       | 86093           | 86093           | 84624         | 78365               |
| Human_11_T0   | Milk         | 85729        | 70931           | 70931           | 69878         | 63444               |
| Human_11_T7   | Milk         | 74927        | 69265           | 69265           | 64837         | 58212               |
| Human_11_T14  | Milk         | 69274        | 59275           | 59275           | 57937         | 52735               |
| Human_12_T0   | Milk         | 68374        | 59986           | 59986           | 58051         | 54059               |
| Human_12_T7   | Milk         | 55189        | 26156           | 26156           | 24752         | 21982               |
| Human_12_T14  | Milk         | 46386        | 19697           | 19697           | 19067         | 18361               |
| Human_13_T0   | Milk         | 61957        | 53337           | 53337           | 52570         | 47402               |
| Human_13_T7   | Milk         | 44752        | 18734           | 18734           | 18031         | 17071               |
| Human_13_T14  | Milk         | 64328        | 24928           | 24928           | 24348         | 22683               |
| Human_14_T0   | Milk         | 83200        | 72623           | 72623           | 71128         | 63300               |
| Human_14_T7   | Milk         | 72547        | 28206           | 28206           | 27029         | 25119               |
| Human_14_T14  | Milk         | 91100        | 38649           | 38649           | 37608         | 35467               |
| Human_15_T14  | Milk         | 74676        | 67920           | 67920           | 66616         | 62529               |
| Human_15_T0   | Milk         | 90147        | 38652           | 38652           | 37555         | 34950               |
| Human_15_T7   | Milk         | 50179        | 21983           | 21983           | 21253         | 19999               |
| Human_16_T14  | Milk         | 64733        | 39688           | 39688           | 38421         | 30388               |
| Human_16_T0   | Milk         | 71072        | 30195           | 30195           | 29035         | 26797               |

|              |      |       |       |       |       |       |
|--------------|------|-------|-------|-------|-------|-------|
| Human_16_T7  | Milk | 68755 | 30238 | 30238 | 29434 | 28157 |
| Human_17_T14 | Milk | 76141 | 55594 | 55594 | 54508 | 49288 |
| Human_17_T0  | Milk | 47306 | 19961 | 19961 | 18935 | 16235 |
| Human_17_T7  | Milk | 18148 | 7875  | 7875  | 7250  | 7003  |
| Human_18_T14 | Milk | 65117 | 55916 | 55916 | 54328 | 50860 |
| Human_18_T0  | Milk | 60020 | 22682 | 22682 | 20783 | 16357 |
| Human_18_T7  | Milk | 82064 | 32527 | 32527 | 31488 | 28679 |
| Human_19_T14 | Milk | 75146 | 48939 | 48939 | 48143 | 46481 |
| Human_19_T0  | Milk | 62704 | 24980 | 24980 | 23579 | 22819 |
| Human_19_T7  | Milk | 81723 | 26432 | 26432 | 25653 | 25151 |
| Human_20_T14 | Milk | 74916 | 56040 | 56040 | 54821 | 50769 |
| Human_20_T0  | Milk | 59717 | 23454 | 23454 | 22902 | 22274 |
| Human_20_T7  | Milk | 70346 | 20371 | 20371 | 19800 | 18984 |

---

**Supplementary Table 9:** Covariances between T7 as well as T10 abundance of *B. mongoliense* BMONG18 and genera observed at T0 in faecal samples of Milk group individuals.

|            | <i>Lachnospiraceae</i> NK4B4 group | <i>Subdoligranulum</i>  |
|------------|------------------------------------|-------------------------|
| <b>T7</b>  | 0.611 (p-value = 0.022)            | 0.556 (p-value = 0.037) |
| <b>T10</b> | 0.722 (p-value = 0.007)            | 0.667 (p-value = 0.012) |

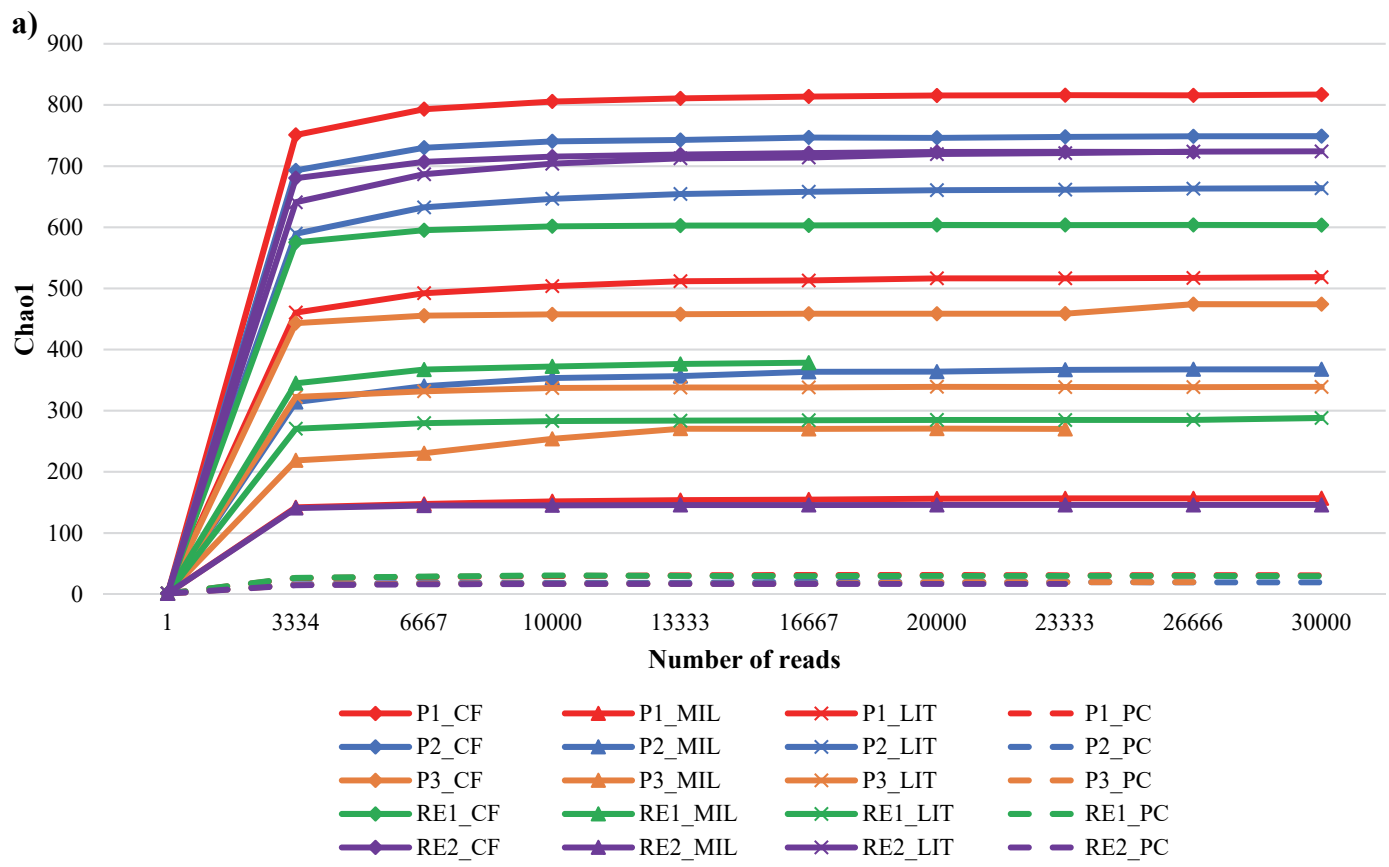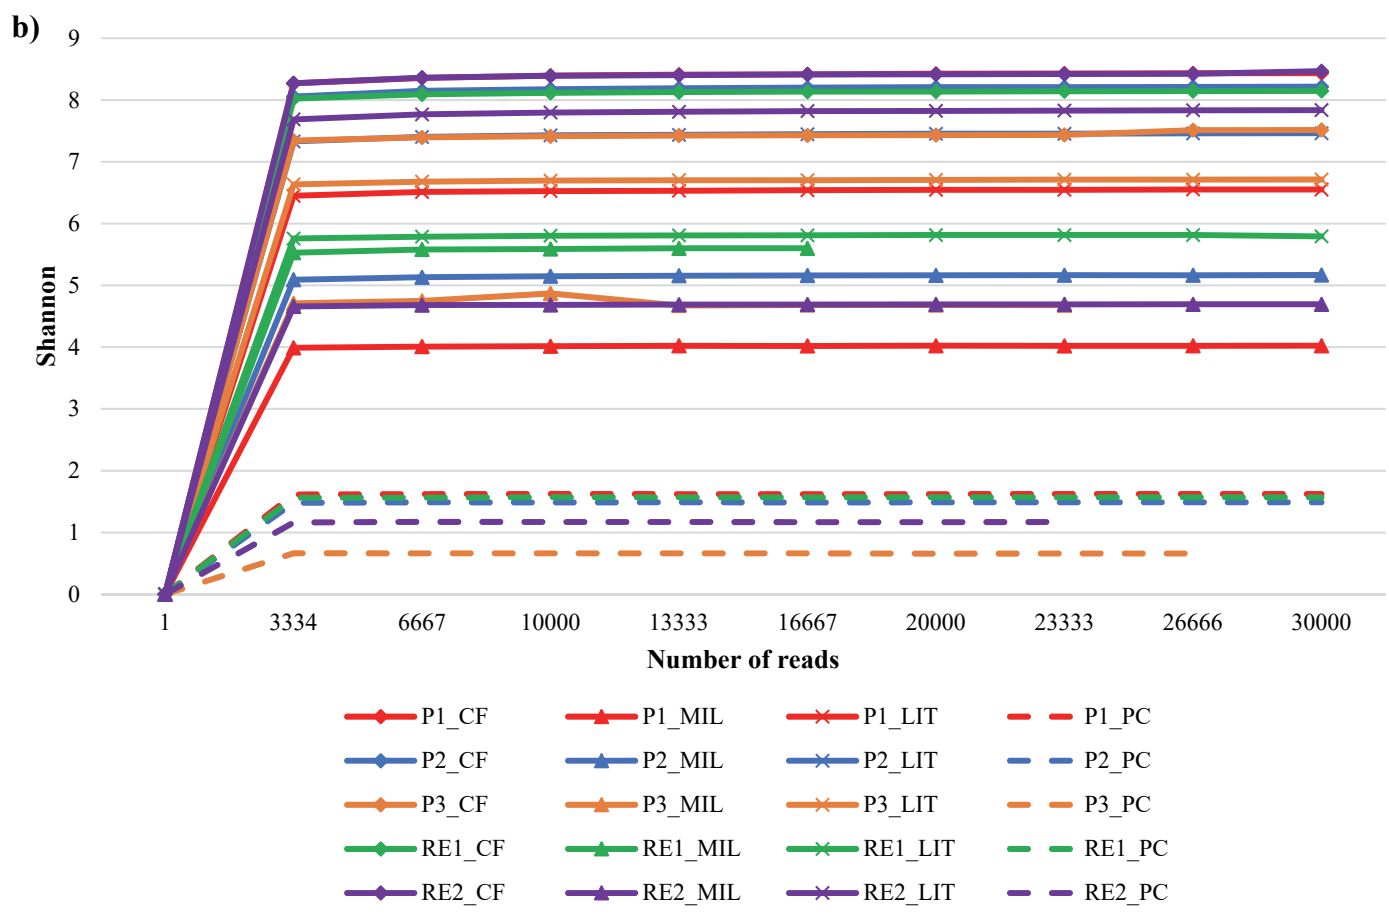

Average alpha-diversity curves of the 165 samples included in this study. The curves reported in the graphs represents the average Chao1 (panel a) and Shannon (panel b) biodiversity indexes observed for each matrix type sampled in the five cheese making sites at 10 subsampling of the whole 16S rRNA gene profiling data normalized at 30,000 reads. Source data are provided as a Source Data file.

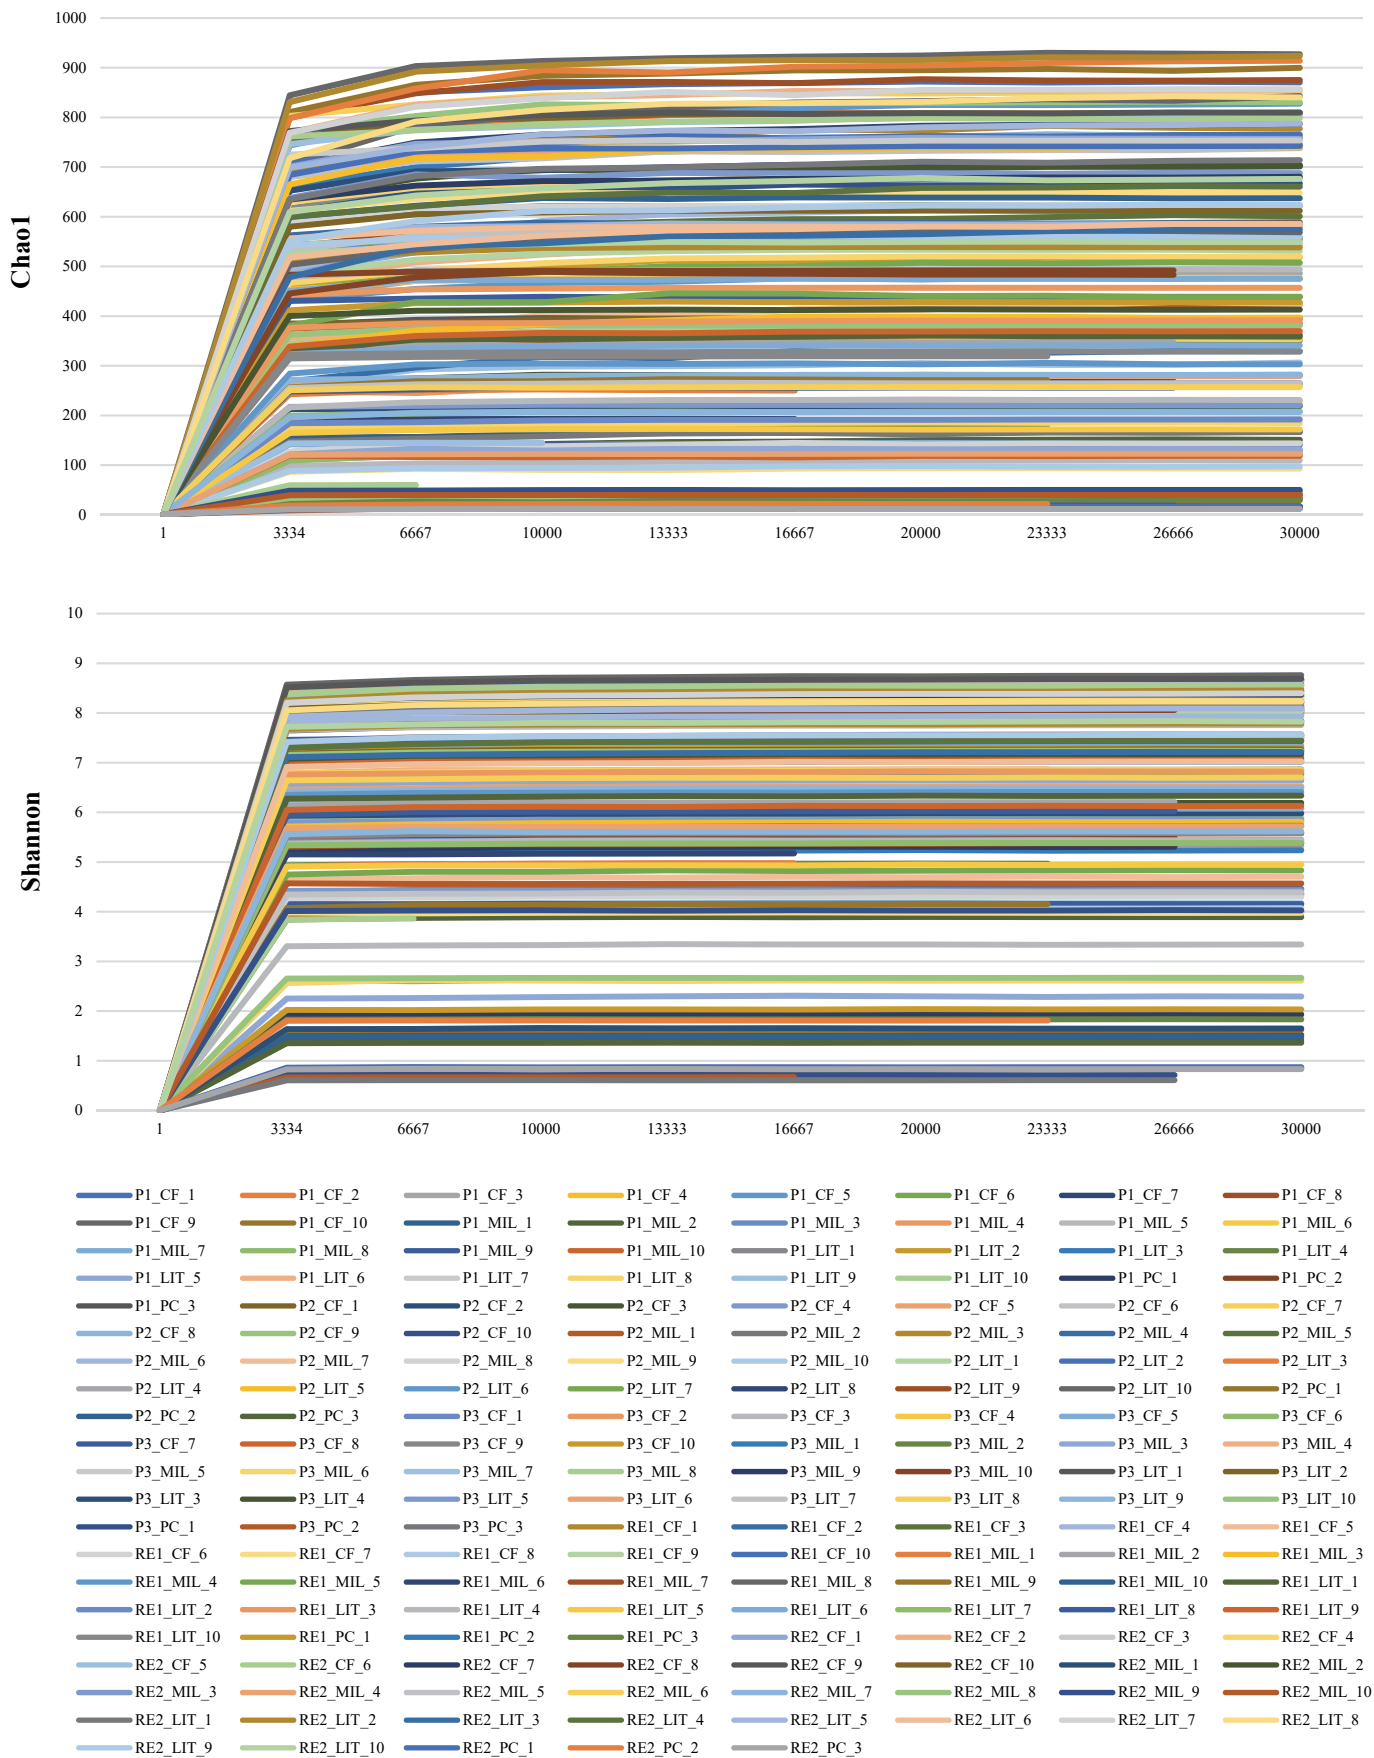

Alpha-diversity curves of all 165 samples included in this study. The curves reported in the graphs represents the Chao1 (panel a) and Shannon (panel b) biodiversity indexes observed at 10 subsampling of the whole 16S rRNA gene profiling data normalized at 30,000 reads. Source data are provided as a Source Data file.

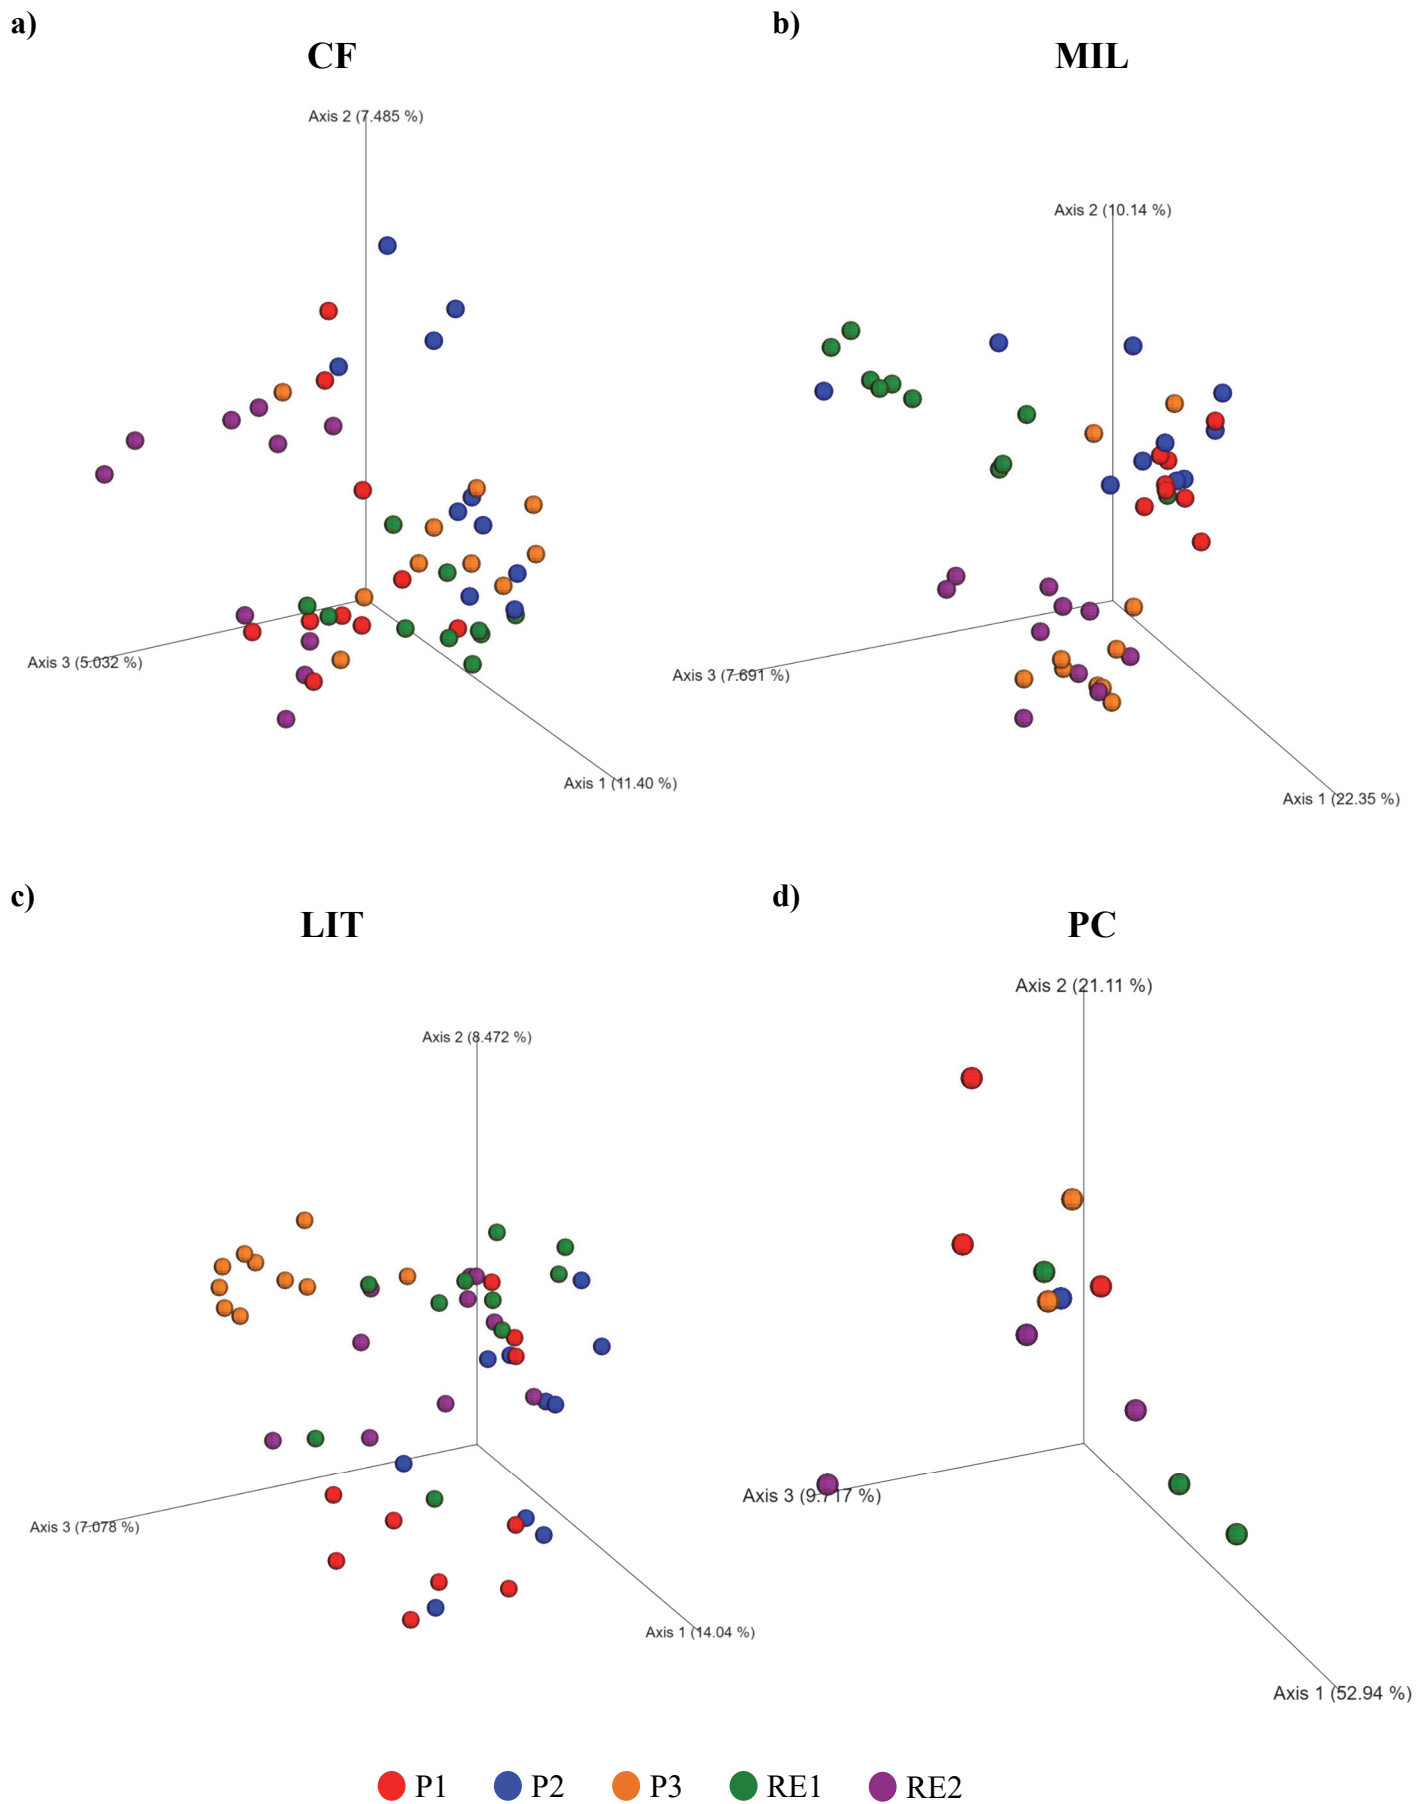

Beta-diversity of all the 165 included in this study grouped by matrix type. Panels a, b, c and d reports a PCoA representation of all the CF, MIL, LIT and PC samples, respectively. Source data are provided as a Source Data file.

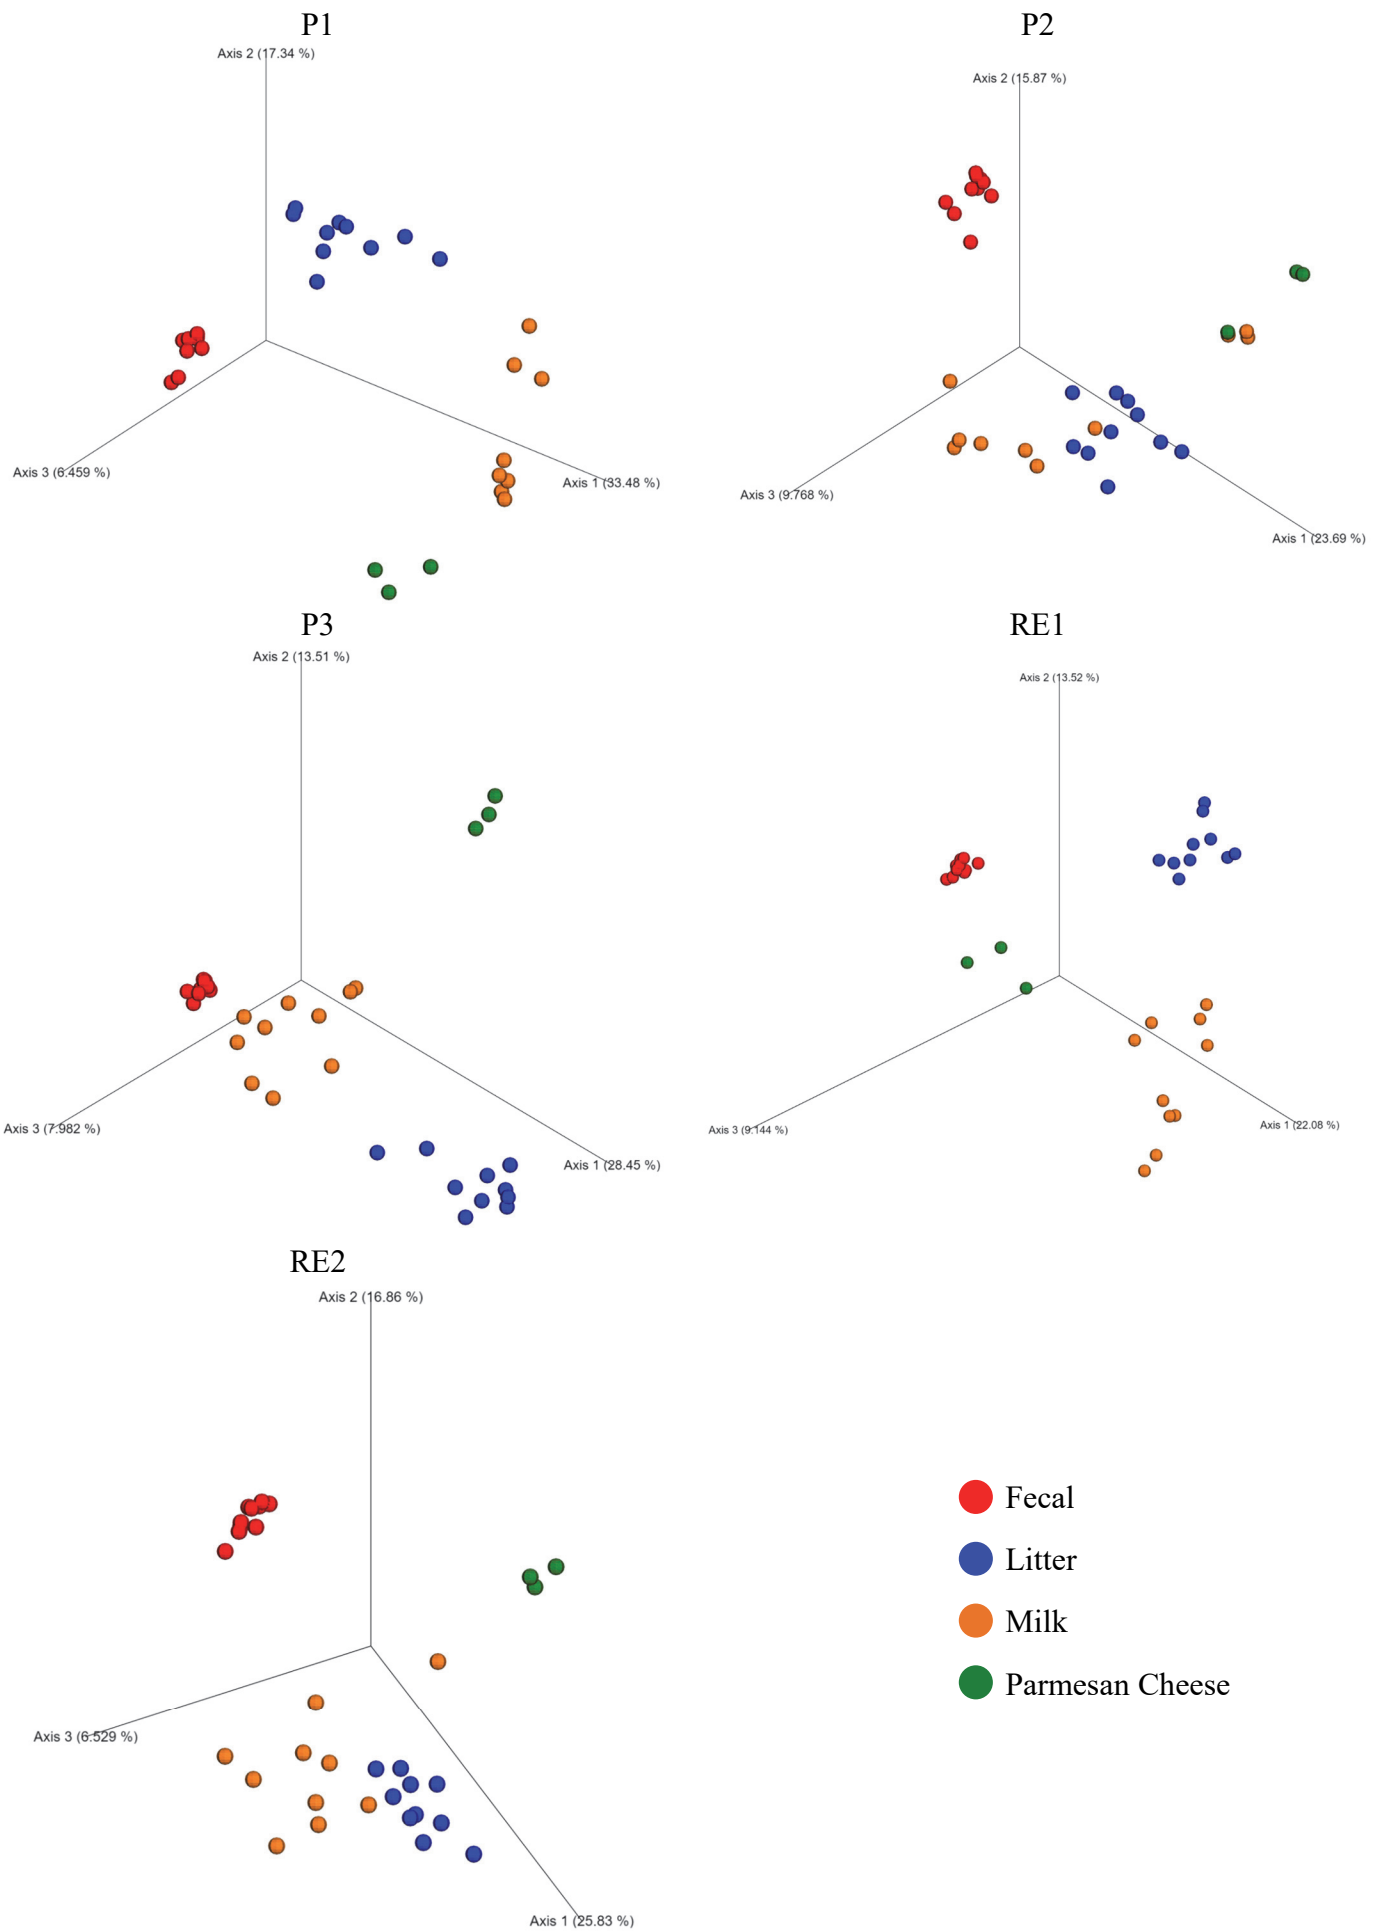

Beta-diversity of all 165 samples included in this study grouped by cheesemaking site. Panels a, b, c, d and e reports a PCoA representation of all the CF, MIL, LIT and PC samples collected from P1, P2, P3, RE1 and RE2 cheesemaking sites, respectively. Source data are provided as a Source Data file.



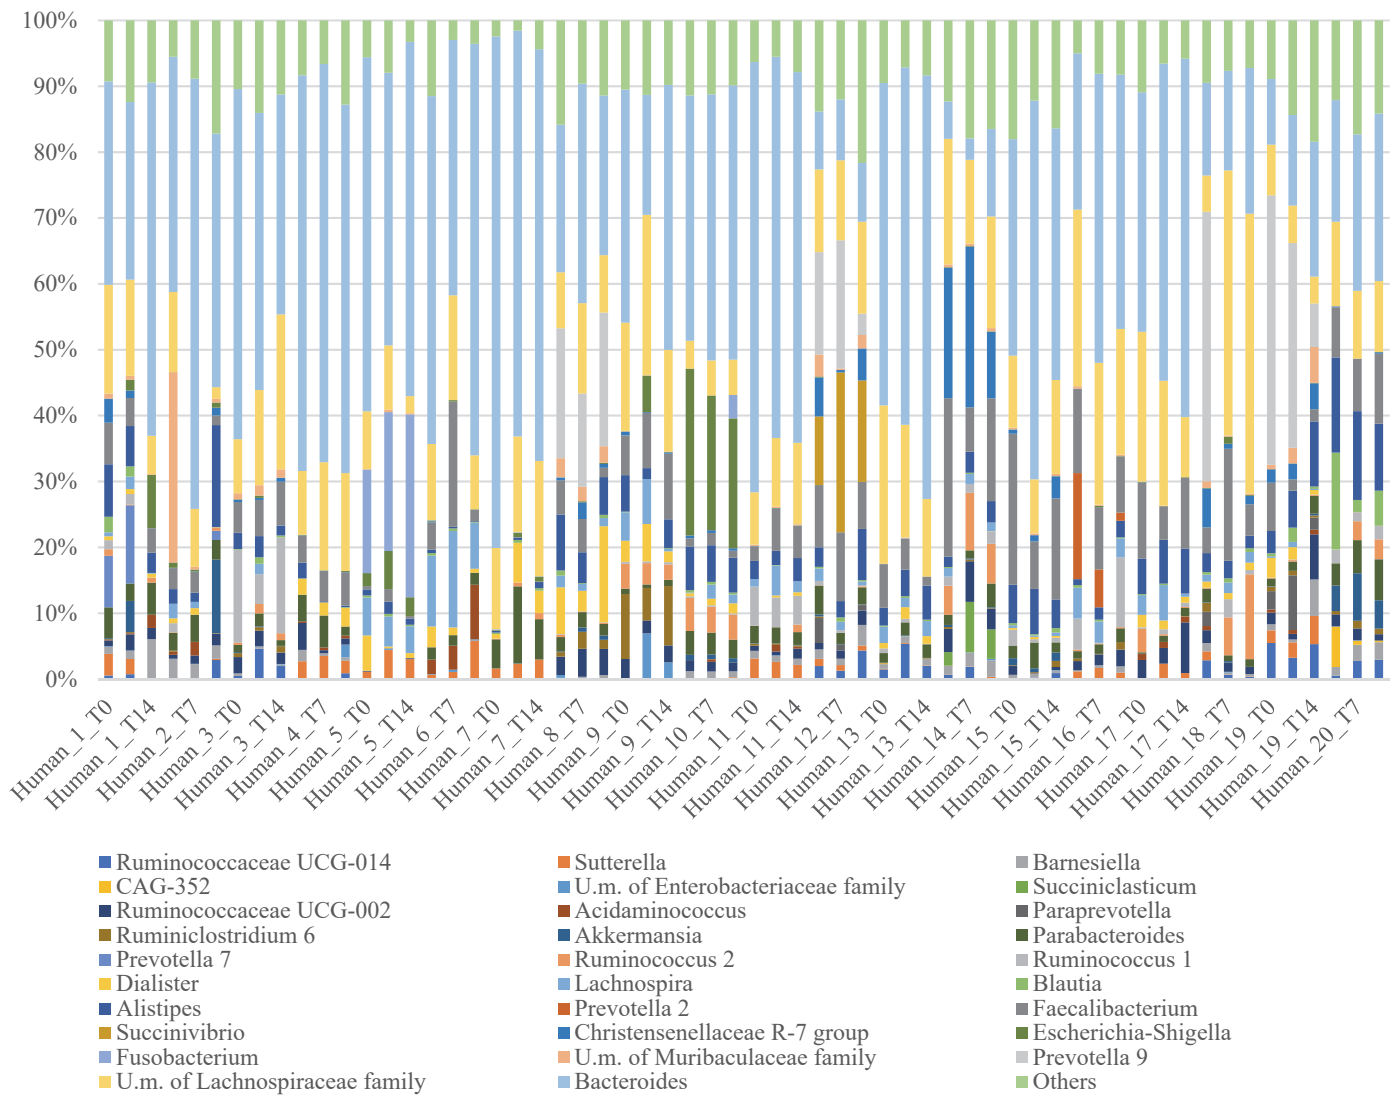

Genus-level taxonomic composition of the gut microbiota composition at T0, T7 and T14 of individuals enrolled in the pilot study. The bar plot shows only genera with relative abundance >5 % in at least a sample. Source data are provided as a Source Data file.

**Supplementary Figure 5**
