# Supplementary material for: Colonization of the human gut by bovine bacteria present in Parmesan cheese
Source: Nat Commun. 2019 Mar 20;10:1286. doi: 10.1038/s41467-019-09303-w (PMC6426854; doi:10.1038/s41467-019-09303-w)
Supplement: Supplementary file 6 — Supplementary Data 3 [file 41467_2019_9303_MOESM6_ESM.xlsx]

## Sheet: Bifidobacterial ITS profiling
Supplementary Excel File 3
Bifidobacterial composition	P1_CF_1	P1_CF_2	P1_CF_3	P1_CF_4	P1_CF_5	P1_CF_6	P1_CF_7	P1_CF_8	P1_CF_9	P1_CF_10	P1_MIL_1	P1_MIL_2	P1_MIL_3	P1_MIL_4	P1_MIL_5	P1_MIL_6	P1_MIL_7	P1_MIL_8	P1_MIL_9	P1_MIL_10	P1_PC_1	P1_PC_2	P1_PC_3	P2_CF_1	P2_CF_2	P2_CF_3	P2_CF_4	P2_CF_5	P2_CF_6	P2_CF_7	P2_CF_8	P2_CF_9	P2_CF_10	P2_MIL_1	P2_MIL_2	P2_MIL_3	P2_MIL_4	P2_MIL_5	P2_MIL_6	P2_MIL_7	P2_MIL_8	P2_MIL_9	P2_MIL_10	P2_PC_1	P2_PC_2	P2_PC_3	P3_CF_1	P3_CF_2	P3_CF_3
B. actinocoloniiforme	0	0	0	0	0	0	0	0	0	0	0	0	0	0	0	0	0	0	0	0	0	0	0	0	0	0	0	0	0	0	0	0	0	0	0	0	0	0	0	0	1.73485e-05	0	0	0	0	0	0	0	0
B. adolescentis	1.09077e-05	0	1.07523e-05	0	0	0	0.16102	0.00176031	0.104057	9.44457e-06	0.195205	0	0.0732789	0.0541444	0.360751	0.0317994	0.102951	0.137954	0.0466465	0.00808162	0.0112877	0.0185583	0.00279692	1.55809e-05	0.0262047	1.26119e-05	4.69586e-05	0	9.55688e-05	1.19865e-05	0.0350364	0	0	0.313192	0.0185476	0.00283015	0.0200272	0.0653464	0	0.0190894	0.0425298	0.0357238	0.191234	0.000445258	6.2315e-05	0	0.0110666	0.0478265	0.0125053
B. aesculapii	0	0	0	0	0	0	0	0	0.000497018	0	0	0	0	0	0	0	0	0	0	0	0	0	0	0	0	0	0	0	0	0	0	0	0	0	0	0	0	0	0	0	0	0	0	0	0	0	0	0	0
B. angulatum	0	0	0	0	0	0	0	0	0	0	0	0	0	0	4.44129e-05	0	0	0	0	0	0	0	0	0	0	0	0	0	0	0	0	0	0	0	0	0	0	5.77392e-05	0	1.45277e-05	0	0	0	0	0	0	0	0	0
B. animalis subsp animalis	0	0	0	1.0211e-05	0	0	0	0	0	0	0	0	0	0	2.96086e-05	0	0	0	0	0	2.99012e-05	9.59704e-05	0	0	0	0	0	0	0	0	0	0	0	0	0	0	0	0	0	0	2.60227e-05	0	0	0	0	0	0.000470921	0	0
B. animalis subsp lactis	2.18155e-05	0.00105316	0.103384	0.540783	0.177946	0.00499304	0.373419	0.0238292	0.0344524	0.00255948	0.508571	0.904982	0.269714	0.00193054	0.175934	0.790226	0.286712	0.168273	0.603431	0.238673	0.00695202	0.00644202	0.00574161	0	0.00942931	0	0	1.03911e-05	0.00119461	0.00082707	0	2.48435e-05	0.0488031	0	0.125404	0.00454193	0.0212634	0.201149	1.97353e-05	0.0224308	0.0361282	0.586834	1.08195e-05	0.00362803	0	0.0369631	0.0107134	0.00880765	0.000927357
B. anseris	0	0	0	0	0.00798027	0	0	0	0.00176215	0	0	0	0	0	0.00020726	0	0	0	0	0	5.98024e-05	0	0	0	0	0	0	0	0	0	0	0	0	0	0	0	0	0	0	0	0	0	0	0	0	0	0	0	0
B. aquikefiri	0	0	0	0	0	0	0	0	0	0	0	0	0	0	2.96086e-05	3.63214e-05	0	0	0	0	0.000299012	0.000863734	0.000464395	0	0	0	0	0	0	0	0	0	0	0	0	0	0	0.0157917	0	0	0	0	0	0.00338066	0	0.027782	0	0	0
B. asteroides	0	0	0	0	0	0	0	0	0.00454094	0	0	0	0	0	5.92171e-05	0	0	0	0	0	1.49506e-05	1.19963e-05	1.05544e-05	0	0	0	0	0	0	0	0	0	0	0	0	0	8.24165e-05	0	0	2.90554e-05	4.33712e-05	0	0	0	0	0	0.00035319	0	0
B. biavatii	0	0	0	0	0	0	0	0	0	0	0	0	0	0	0	0	0	0	0	0	1.49506e-05	0.000119963	2.11088e-05	0	0	0	0	0	0	0	0	0	0	0	0.0114231	0	0.021497	0.05989	0	0.0182323	0.0110943	0	0	0	0	0	0	0	0
B. bifidum	0.105107	0.00230844	0.814436	0	0.000400584	0	0.240986	0.0982113	0.0525258	0.00332449	0.00955498	0.0513888	0.0137156	0.0270096	0.214188	0.0670493	0.0729742	0.0115507	0.117136	0.00179735	0.00113624	0.00229129	0.0026175	0.00266434	0.0208459	2.52239e-05	1.56529e-05	0	0.000238922	8.39057e-05	0	2.48435e-05	0.00243722	1.05801e-05	0.00208388	0.00114119	0.520941	0.037083	0	0.524741	0.53016	0.159732	0	0.000544204	0.270447	3.2557e-05	0.00470921	0.00587177	0.000618238
B. bombi	0	0	0	0	0	0	0	0	0	0	0	0	0	0	0	0	0	0	0	0	1.49506e-05	0	0	0	0	0	0	0	0	0	0	0	0	0	0	0	0	0	0	0	0	0	0	0	0	0	0	0	0
B. boum	0	0	0	0	0	0	0	0	0	0	0	0	0	0	0.000532954	0	0	0	8.91902e-05	0	0.000179407	7.19778e-05	0.000411623	0	0	0	0	0	0	0	0	0	0	0	0	0	2.74722e-05	0	0	2.90554e-05	4.33712e-05	0	0	0	0	0	0.000588651	0	0.000112407
B. breve	1.09077e-05	0	1.07523e-05	0.0700778	0.00157092	0	0	0	0.0711639	0.000217225	0.210266	0.00722012	0.100649	0.169315	0.13241	0.0360308	0.0775883	0.25035	0.05396	0.00311627	0.011811	0.00993294	0.00350407	0	0.166356	0.0206583	0	0	1.59281e-05	0.000407542	0	2.48435e-05	0.0152678	0	0.0285088	1.14119e-05	0.236631	0.0771685	0	0.223756	0.210792	0.038541	0	0.0279193	0	0.0778981	0.00930068	0.0493418	0.00497401
B. catenulatum	0	0	0	0	0.0091506	0	0	0	0.00942075	0	0	0	0	0	0.000177651	0.000236089	0.000200176	0	0	5.17224e-05	8.97035e-05	1.19963e-05	8.44354e-05	0	0	1.26119e-05	0	0	0	0.000323636	0	0	0	0.041929	0	0	0.0076922	0.00780923	0	0.00852776	0.00669651	0	0	6.59641e-05	0	0.00444946	0.00011773	0.0181835	0.00016861
B. choerinum	0	0	0	0	0	0	0	0	0.00203326	0	0	0	0	0	0	0	0	0	0	0	0	0	0	0	0	0	0	0	0	0	0	0	0	0	0	0	0.000192305	0	0	8.71662e-05	1.73485e-05	0	0	0.00155016	0	0.0253945	0.0377914	0	0
B. criceti	0	0	0	0	0	0	0	0	0	0	0	0	0	0	1.48043e-05	0	0	0	0	0	0	0	0	0	0	0	0	0	0	0	0	0	0	0	0	0	0	0	0	0	0	0	0	0	0	0	0	0	0
B. crudilactis	5.45387e-05	0	0	0	7.8546e-06	0	0	0	0.000677752	0	0.00949822	0	0	1.78753e-05	1.48043e-05	0	0.00179158	0	0	0	0.0276287	0.0517401	0.0422282	0	0	0	0	0	0	0	0	7.45305e-05	0	0	0.782666	0	5.49443e-05	4.33044e-05	0.000148015	0	0	0	0	0.0746384	0	0.293404	0.00023546	0	0
B. cuniculi	0	0	0	0	0	0	0	0	4.51834e-05	0	0	0	0	0	0	0	0	0	0	0	0	0	0	0	0	0	0	0	0	0	0	0	0	0	0	0	0.000247249	0	0	0.000479414	0.000121439	0	0	0	0	0	0	0	0
B. dentium	0	0	0	0	7.8546e-06	0	0	0	0.0400325	0	0	0.0149027	0.00207566	1.78753e-05	0.00216143	0.00216112	0.00133117	0	0.000743251	0.00116375	0.000149506	5.99815e-05	3.16633e-05	0	0	0	0	0	1.59281e-05	0	0	0	0	0	0	0.00293285	0.00289831	0.103483	0	0.0026731	0.00186496	0.00090018	0	0	0	0	0.0131858	0.00520883	0.0148096
B. eulemuris	0	0	0	0	0	0	0	0	0	0	0	0	0	0	0.000444129	0	0	0	0	0	0.000149506	0	0	0	0	0	0	0	0	0	0	0	0	0	0	0	0	0	0	0	0	0	0	0	0	0	0	0.000189412	0
B. gallinarum	0	0	0	0	0	0	0	0	0	0	0	2.56944e-05	0	0	4.44129e-05	0	0.00100088	0	0	0	7.47529e-05	0	0	0	0	0	0	0	0	0	0	0	0	0	0.00537881	0	0	0	9.86767e-06	0	0	0	0	0.00234173	0	0	0	0	0.000674441
B. hapali	0	0	0	0	0	0	0	0	0	0	0	0	0	0	1.48043e-05	0	0	0	0	0	2.99012e-05	0	0	0	0	0	0	0	0	0	0	0	0	0	0	0	0	0	0	0	8.67423e-06	0	0	0	0	0	0	0	0
B. imperatoris	0	0	0	0	0	0	0	0	0	0	0	0	0	0	1.48043e-05	0	0	0	0	0	0	0	0	0	0	0	0	0	0	0	0	0	0	0	0	0	0	0	0	0	0	0	0	0	0	0	0	0	0
B. italicum	0	0	0	0	0	0	0	0	0	0	0	0	0	0	0	0	0	0	0	0	1.49506e-05	0	0.000147762	0	0	0	0	0	0	0	0	0	0	0	0	0	4.12082e-05	0	0	1.45277e-05	0	0	0	0	0	0	0	0	0
B. kashiwanohense	0	0	0	0	0	0	0	0	0	0	0	0	0	0	0.000118434	0	0	0	0	0	2.99012e-05	8.39741e-05	1.05544e-05	0	0	0	0	0	0	0.000215757	0	0	0	2.11602e-05	0	0	1.37361e-05	1.44348e-05	0	0	1.73485e-05	0	0	0	0	1.08523e-05	0	0	0
B. lemurum	0	0	0	0	0	0	0	0	0	0	0	0	0	0	2.96086e-05	0	0	0	0	0	0	0	0	0	0	0	0	0	0	0	0	0	0	0	0	0	0	0	0	0	0	0	0	0	0	0	0	0	0
B. longum subsp infantis	0	0	0	0	0.000235638	0.000924285	0.0587596	0	0.00533165	0.000519451	0	0	0.300808	0.226624	0.0249304	0.00797254	0.149502	0.0252932	0.0293733	0.305692	0.000538221	0.0319462	0.000759919	0	0.00307001	0.0409509	0	0	0.000222994	0.0040035	0	2.48435e-05	0.0141312	0.0357819	0.00103648	0.00737207	0.0938723	0.0593559	0	0.0962606	0.0959196	0.0442589	0.0120529	0.0155346	0	0.0354655	0.00105957	0	0.000140509
B. longum subsp longum	0	0.103986	0.00882767	0.0949211	0.00989679	0.52346	0	0.00433581	0.120888	0.495084	0.06399	0.00922429	0.080035	0.131133	0.0428584	0.0472541	0.202989	0.110166	0.13765	0.40827	0.00671281	0.0468576	0.000781027	0.00543775	0.115536	0.0825955	1.56529e-05	0	9.55688e-05	0.00409939	0	1.24217e-05	0.0302778	0.00706751	0.00699354	0.00293285	0.0011813	0.105042	1.97353e-05	0.00156899	0.00547344	0.129909	0.796334	0.560497	0.729257	0.0572787	0.0062397	0.044133	0.00421526
B. longum subsp suis	0	0.0550408	1.07523e-05	0	0	0.461028	0.000191858	0	0.0176441	0.475232	0	0	0.000793635	0.00080439	0.00188014	1.81607e-05	0.0010209	0.000226732	0.000475681	0.00111203	0.000747529	0.0006478	4.22177e-05	0	0	8.82835e-05	0	0	0	0.000143838	0	0	2.34348e-05	0.00222182	0	2.28238e-05	0.000274722	0.000202087	0	0.000159805	0.000338295	0.00030006	2.16389e-05	8.24552e-05	1.55788e-05	4.34094e-05	0.0023546	0.00577706	0.000393424
B. longum subspp.	0	0.000457432	0	1.0211e-05	7.8546e-06	0.00423075	7.6743e-05	0	0.00128773	0.0020778	1.89208e-05	0.000102778	0.00655257	0.000625637	0.000162847	7.26427e-05	0.00217191	0.00141077	0.000445951	0.0304386	0.000104654	2.39926e-05	7.3881e-05	0	2.74108e-05	8.82835e-05	0	0	0	4.79461e-05	0	0	0.000164044	5.29005e-05	1.09104e-05	1.14119e-05	0.000137361	0.000577392	0	1.45277e-05	0.000104091	0.0005001	0.000129834	0.000329821	6.2315e-05	0.000293013	0.00011773	0.00369353	0
B. magnum	0.858319	0	0	0	0	0	6.39525e-05	0.854449	0.0415914	0.0151207	0	0	0	1.78753e-05	4.44129e-05	0	3.00264e-05	0	0.00353788	0	1.49506e-05	0.000107967	0.000116099	0.719621	0.14943	1.26119e-05	0	1.03911e-05	0	0.0059573	0.34578	4.9687e-05	2.34348e-05	0	2.18207e-05	0.0856918	4.12082e-05	0	0	1.45277e-05	2.60227e-05	0	1.08195e-05	0	0	3.2557e-05	0.00211914	0.0894971	0.000618238
B. margollesii	0	0	0	0	0	0	0	0	0	0	0	0	0	0	0	0	0	0	0	0	1.49506e-05	0	0	0	0	0	0	0	0	0	0	0	0	0	0	0	2.74722e-05	0	0	0	0	0	0	0	0	0	0	0	0
B. merycicum	0	0	0	0	0	0	0	0	0	0	0	0	0	0	0	0	5.0044e-05	1.25962e-05	0	0	0	0	0	0.00146461	0.000397456	0.00238365	0	0	0.00922239	0.00629293	0.108969	0	0	0.0074484	0	4.56475e-05	0	0	0	0	0	0	1.08195e-05	0	0	0	0.0050624	0	0.00444007
B. minimum	0	0	0	0	0	0	0	0	0	0	0	0	0	0	0	0	0	0	0	0	0	0	0	0	0	0	0	0	0	0	0	0	0	0	0	0	0	0	0	0	1.73485e-05	0	0	0	0	0	0	0	0
B. mongoliense	0	0	0	0	0	0	0	1.18142e-05	0.00375023	3.77783e-05	0	0	0	0	0	0	0	0	0	0	0.546773	0.663204	0.86312	0	0	0	0	0	0	0	0	0	2.34348e-05	1.05801e-05	0	0	0	0	0	0	1.73485e-05	0	0	0.283662	0	0.317854	0.00011773	0.0140165	5.62035e-05
B. moukalabense	0	0	0	0	0	0	0	0	0	0	0	0	0	0	0	0	0	0	0	0	0	0	0	0	0	0	0	0	0	0	0	0	0	0	0	0	0	0.000115478	0	0	0	0	0	0	0	0	0	0	0
B. parmae	0	0	2.15047e-05	0	0	0	0	0	0.00239472	0	0	0	0	0	0.0024279	0	0	0	0.00026757	0	0.0011811	3.59889e-05	0	0	0	0	0	0	0	0	0	1.24217e-05	0	0.128781	0.00567339	0	0	0	0	5.81108e-05	0.000112765	1.667e-05	0	0	0	0.0363228	0.00105957	0	0
B. pseudocatenulatum	0	3.19139e-05	0	0	4.71276e-05	0	0	0	0.034859	2.83337e-05	0	0	0.0027065	1.78753e-05	0.00639545	0.000835392	0.00207182	0.101651	0.000386491	0.000685321	0.000284061	0.000215933	8.44354e-05	0	0.00237103	0	0	0	0	0	0	0.0115771	0.00119518	0	0.00104739	0	0.044917	0.0738052	0	0.0460383	0.0343326	0.00013336	0	0	0	0	0.00105957	0.00653471	0.000618238
B. pseudolongum subsp globosum	8.72619e-05	0.832005	5.37617e-05	0.294127	0.374052	3.81148e-05	0.120794	0.0158546	0.0666682	0.00476006	0	0.00999512	0.141898	0.329764	0.00537396	0.0106603	0.0639663	0.190707	0.000386491	9.05141e-05	0.000986739	0.000527837	0.0011821	1.55809e-05	0.503879	0.852907	0.999671	0.887319	0.98533	0.972958	0.508318	0.983479	0.876979	8.46409e-05	0.0100375	0.88765	0.00111262	0.105085	0.999526	0.00244065	0.000607196	0.00021671	0.000162292	0.00407329	4.67363e-05	0.0830638	0.847422	0.0129747	0.906337
B. pseudolongum subsp pseudolongum	0.0346648	0.000755295	0.0731589	0	0.409067	0.00529796	2.5581e-05	0.00147677	0.016492	0.00100112	0	0	0.000203496	0	0.00146562	0	0.00154136	0.000403079	0.00112974	0.000142236	0.000104654	4.79852e-05	3.16633e-05	0	0.00164465	3.78358e-05	4.69586e-05	0.000477992	0.00302635	0.00284081	6.58579e-05	0.00209927	0.00831937	1.05801e-05	1.09104e-05	0.00329803	0.000343402	0.000202087	0.000236824	0.000755441	0.000277575	0.00026672	0	3.29821e-05	0	0	0.00588651	0	0.00536743
B. pseudolongum subspp.	1.09077e-05	0.00435092	3.2257e-05	0	0.00783889	0	0.000191858	7.08851e-05	0.00411169	0	0	0	0.000406992	0	0.000192456	5.44821e-05	0.000310273	0.000214135	0.00014865	1.29306e-05	4.48518e-05	0	0	0	0.000630448	1.26119e-05	0	0.000249387	0.000525628	0.00129454	0.000210745	0.00238497	0.000585871	0	0	0.00147213	1.37361e-05	0	2.9603e-05	4.35831e-05	3.46969e-05	3.334e-05	0	0	0	0	0.00164822	0.000568236	0.0015456
B. pullorum	0	0	0	0	0	0	0	0	0	0	0	0	0	0	0	0	0	0	0	0	0	0	0	0	0	0	0	0	0	0	0	0	0	0	0	0	0	0	0	0	0	0	0	0	0	0	0	0.000189412	0
B. reuteri	0	0	0	0	0	0	0	0	0	0	0	0	0	0	0	0	0	0	0	0	0	0	0	0	0	0	0	0	0	0	0	0	0	0	0	0	0	0	0	0	0	0	0	0	0	0	0	0	0
B. saguini	0	0	0	0	0	0	0	0	0	0	0	0	0	0	0	0	0	0	0	0	0	1.19963e-05	0	0	0	0	0	0	0	0	0	0	0	0	0	0	0	0	0	0	8.67423e-06	0	0	0	0	0	0	0.000189412	2.81017e-05
B. scardovii	0	0	0	0	0	0	0	0	0.000158142	0	0	0	0	0	4.44129e-05	0	0	0	0.000297301	0	1.49506e-05	1.19963e-05	0	0	0	0	0	0	0	0	0	0	0	0	0	0	0	0	0	1.45277e-05	0	0	0	0	0	0	0	0	0
B. subtile	0	0	0	0	0	0	0	0	0.000971444	0	0	0	0	0	4.44129e-05	0	0	0	0	0	0	0	1.05544e-05	0	0	0	0	0	0	0	0	0	0	0	0	0	0	0	0	0	0	0	0	0	0	0	0	0	0
B. thermacidophilum subsp porcinum	0	0	0	0	7.06914e-05	0	0	0	0	0	0	0	0	0	0	0	0	0	0	0	0	0	0	0	0	0	0	0	0	0	0	0	0	0.00232762	0	0	5.49443e-05	0	0	0	0	0	0	0	0	0	0	0	0
B. thermacidophilum subsp thermacidophilum	0	0	3.2257e-05	0	0	0	0	0	0.000745527	0	0	0	0	0	2.96086e-05	0	0.000220194	0	0	0	0	0	0	0	0	1.26119e-05	0	0	0	0	0	0	0	0.387232	0	0	0	0	0	0	0	0	0	3.29821e-05	0	0	0.00035319	0	0
B. thermophilum	0	0	0	0	0	0	1.27905e-05	0	0.00142328	0	0	0	0	1.78753e-05	0	0	0	0	0	0	0	0.000143956	0.000179425	0.155903	0	0	0	0.106592	0	0	0	0	0	0	0	0	0.0243953	0.084689	0	0.0243775	0.0188491	0	0	0	0	0	0	0	0
B. tissieri	0	0	0	0	0	0	0	0	0	0	0	0	0	0	0.000325694	0	0	0	0	0	4.48518e-05	0	1.05544e-05	0	0	0	0	0	0	0	0	0	0	0	0	0	0	0	0	5.81108e-05	0	0	1.08195e-05	0	0	0	0	0	0
B. tsurumiense	0	0	0	0	0	0	0	0	0.00241731	0	0	0	0	0	7.40214e-05	0	0	0	0	0	0	0	0	0	0	0	0	0	0	0	0	0	0	0	0	0	0	0	0	0	1.73485e-05	0	0	0	0	0	0	0	0
B. vansinderenii	0	0	0	0	0	0	0	0	0	0	0	0	0	0	0.00322733	0	0	0	0	0	0.000358814	0.000215933	2.11088e-05	0	0	0	0	0	0	0	0	0	0	0	0	0	0	0	0	7.26385e-05	0.000260227	0	0	0	0	0	0	0	0
Putative new bifidobacterial taxa	0.00171252	1.0638e-05	2.15047e-05	7.14767e-05	0.00172016	2.85861e-05	0.0444598	0	0.358056	2.83337e-05	0.00289488	0.00215833	0.00716306	0.0585596	0.0233019	0.00559349	0.0315778	0.00178866	0.00389464	0.000672391	0.382107	0.165717	0.0755169	0.114878	0.00017817	0.000201791	0.000203487	0.00534104	1.59281e-05	0.000491448	0.00162011	0.00021117	0.00176933	0.073828	0.0011565	4.56475e-05	0.0020192	0.00308905	9.86767e-06	0.00801929	0.00404219	0.00263386	2.16389e-05	0.0212405	0.000109051	0.0037115	0.0369673	0.686997	0.04145
[truncated: 84 more columns]
